# Supplementary material
Source: PubMed Central journal article supplement (PMC5399742)
Supplement: Supp_Table1.pdf [file Supp_Table1.pdf]

| Gene Name         | Unique HCC Integrations | Unique Normal      | Total                       | Locus Size (bp) | Integration                      |
|-------------------|-------------------------|--------------------|-----------------------------|-----------------|----------------------------------|
|                   |                         | Liver Integrations | Number Integrations in Gene |                 | Frequency Normalize to Gene Size |
| Mir341 (Rian)     | 18                      | 3                  | 21                          | 96              | 2.19E-01                         |
| AC152063.1 (Rian) | 1                       | 0                  | 1                           | 87              | 1.15E-02                         |
| Mir212            | 0                       | 1                  | 1                           | 91              | 1.10E-02                         |
| Alb               | 68                      | 75                 | 143                         | 15715           | 9.10E-03                         |
| Igfbp1            | 14                      | 9                  | 23                          | 4765            | 4.83E-03                         |
| Gm14719           | 0                       | 1                  | 1                           | 231             | 4.33E-03                         |
| 7SK               | 1                       | 0                  | 1                           | 284             | 3.52E-03                         |
| Afp               | 23                      | 28                 | 51                          | 18194           | 2.80E-03                         |
| Gm16326           | 1                       | 0                  | 1                           | 414             | 2.42E-03                         |
| AY036118          | 0                       | 1                  | 1                           | 725             | 1.38E-03                         |
| Gm10800           | 1                       | 0                  | 1                           | 755             | 1.32E-03                         |
| Gm11620           | 2                       | 0                  | 2                           | 1845            | 1.08E-03                         |
| Olfr1113          | 0                       | 1                  | 1                           | 981             | 1.02E-03                         |
| Dnajb8            | 0                       | 1                  | 1                           | 989             | 1.01E-03                         |
| Olfr744           | 0                       | 1                  | 1                           | 1105            | 9.05E-04                         |
| Ahsg              | 2                       | 4                  | 6                           | 7397            | 8.11E-04                         |
| Gm14493           | 1                       | 0                  | 1                           | 1238            | 8.08E-04                         |
| Gm15472           | 1                       | 0                  | 1                           | 1258            | 7.95E-04                         |
| RNASEK            | 0                       | 1                  | 1                           | 1719            | 5.82E-04                         |
| Pnmt              | 1                       | 0                  | 1                           | 1732            | 5.77E-04                         |
| Tacstd2           | 0                       | 1                  | 1                           | 1764            | 5.67E-04                         |
| Gm10497           | 0                       | 1                  | 1                           | 1768            | 5.66E-04                         |
| Gm7284            | 1                       | 0                  | 1                           | 1909            | 5.24E-04                         |
| Gm12744           | 1                       | 0                  | 1                           | 2012            | 4.97E-04                         |
| C2cd4d            | 0                       | 1                  | 1                           | 2124            | 4.71E-04                         |
| Tmsb4x            | 1                       | 0                  | 1                           | 2223            | 4.50E-04                         |
| Adrm1             | 1                       | 1                  | 2                           | 4802            | 4.16E-04                         |
| Trf               | 6                       | 5                  | 11                          | 26444           | 4.16E-04                         |
| 4921514A10RIK     | 1                       | 0                  | 1                           | 2428            | 4.12E-04                         |
| Nkx2-1            | 0                       | 2                  | 2                           | 4974            | 4.02E-04                         |
| Foxc2             | 0                       | 1                  | 1                           | 2722            | 3.67E-04                         |
| Cyp2e1            | 3                       | 1                  | 4                           | 11237           | 3.56E-04                         |
| Gm13421           | 0                       | 1                  | 1                           | 2937            | 3.40E-04                         |
| AC139673.1        | 0                       | 1                  | 1                           | 2987            | 3.35E-04                         |
| Osgin1            | 1                       | 3                  | 4                           | 12133           | 3.30E-04                         |

|                   |    |   |    |       |          |
|-------------------|----|---|----|-------|----------|
| 1700031F10Rik     | 0  | 1 | 1  | 3077  | 3.25E-04 |
| Pck1              | 1  | 1 | 2  | 6226  | 3.21E-04 |
| Gm12233           | 0  | 1 | 1  | 3150  | 3.17E-04 |
| Gm15622           | 1  | 0 | 1  | 3252  | 3.08E-04 |
| Pcdhb17           | 1  | 0 | 1  | 3269  | 3.06E-04 |
| Ier5              | 0  | 1 | 1  | 3270  | 3.06E-04 |
| Gm17349           | 1  | 0 | 1  | 3315  | 3.02E-04 |
| Pcdhb20           | 0  | 1 | 1  | 3395  | 2.95E-04 |
| Hoxb8             | 0  | 1 | 1  | 3421  | 2.92E-04 |
| Barx1             | 0  | 1 | 1  | 3510  | 2.85E-04 |
| Rpl35a            | 0  | 1 | 1  | 3737  | 2.68E-04 |
| Rpl35a            | 0  | 1 | 1  | 3737  | 2.68E-04 |
| Rpl35a            | 0  | 1 | 1  | 3737  | 2.68E-04 |
| Rpl35a            | 0  | 1 | 1  | 3737  | 2.68E-04 |
| Rpl35a            | 0  | 1 | 1  | 3737  | 2.68E-04 |
| Rpl35a            | 0  | 1 | 1  | 3737  | 2.68E-04 |
| Isl2              | 1  | 1 | 2  | 7509  | 2.66E-04 |
| Plekho1           | 2  | 0 | 2  | 7573  | 2.64E-04 |
| Ssr4              | 0  | 1 | 1  | 3803  | 2.63E-04 |
| Serp1             | 0  | 1 | 1  | 3905  | 2.56E-04 |
| Rpl31             | 0  | 1 | 1  | 4058  | 2.46E-04 |
| Rpl31             | 0  | 1 | 1  | 4058  | 2.46E-04 |
| Rpl31             | 0  | 1 | 1  | 4058  | 2.46E-04 |
| AC128663.2        | 0  | 3 | 3  | 12207 | 2.46E-04 |
| D4Wsu53e          | 0  | 1 | 1  | 4080  | 2.45E-04 |
| C030014I23Rik     | 1  | 0 | 1  | 4257  | 2.35E-04 |
| Gm20425           | 4  | 5 | 9  | 40100 | 2.24E-04 |
| Ttr               | 2  | 0 | 2  | 9075  | 2.20E-04 |
| Rnasek            | 0  | 1 | 1  | 4625  | 2.16E-04 |
| Bcdin3d           | 1  | 0 | 1  | 4647  | 2.15E-04 |
| Pcdhb21           | 1  | 0 | 1  | 4662  | 2.15E-04 |
| Mid1ip1           | 1  | 0 | 1  | 4678  | 2.14E-04 |
| Gm16933           | 0  | 1 | 1  | 4706  | 2.12E-04 |
| Birc7             | 1  | 0 | 1  | 4988  | 2.00E-04 |
| Llph              | 0  | 1 | 1  | 5002  | 2.00E-04 |
| Llph              | 0  | 1 | 1  | 5002  | 2.00E-04 |
| Llph              | 0  | 1 | 1  | 5002  | 2.00E-04 |
| Itih4             | 2  | 1 | 3  | 15506 | 1.93E-04 |
| Fabp1             | 0  | 1 | 1  | 5197  | 1.92E-04 |
| AC152063.2 (Rian) | 10 | 1 | 11 | 57765 | 1.90E-04 |

|               |    |   |    |        |          |
|---------------|----|---|----|--------|----------|
| Bhmt          | 2  | 2 | 4  | 21071  | 1.90E-04 |
| Krt1          | 1  | 0 | 1  | 5359   | 1.87E-04 |
| Gm11647       | 1  | 0 | 1  | 5392   | 1.85E-04 |
| Spag4         | 1  | 0 | 1  | 5443   | 1.84E-04 |
| Nol3          | 1  | 0 | 1  | 5493   | 1.82E-04 |
| Tha1          | 1  | 0 | 1  | 5530   | 1.81E-04 |
| S1pr5         | 0  | 1 | 1  | 5532   | 1.81E-04 |
| BC007180      | 0  | 1 | 1  | 5631   | 1.78E-04 |
| Zfp503        | 0  | 1 | 1  | 5640   | 1.77E-04 |
| Gm11721       | 1  | 0 | 1  | 5656   | 1.77E-04 |
| AC117253.1    | 0  | 1 | 1  | 5686   | 1.76E-04 |
| Cd8a          | 1  | 0 | 1  | 5745   | 1.74E-04 |
| A330070K13Rik | 0  | 1 | 1  | 5854   | 1.71E-04 |
| Gm13822       | 0  | 1 | 1  | 5960   | 1.68E-04 |
| Lect2         | 0  | 1 | 1  | 6079   | 1.65E-04 |
| Cdkn2c        | 0  | 1 | 1  | 6314   | 1.58E-04 |
| Polr2j        | 1  | 0 | 1  | 6317   | 1.58E-04 |
| Six6          | 0  | 1 | 1  | 6371   | 1.57E-04 |
| Naif1         | 0  | 1 | 1  | 6497   | 1.54E-04 |
| Pex16         | 1  | 0 | 1  | 6542   | 1.53E-04 |
| Dpagt1        | 0  | 1 | 1  | 6756   | 1.48E-04 |
| Grb10         | 13 | 3 | 16 | 108176 | 1.48E-04 |
| Lims2         | 3  | 1 | 4  | 27113  | 1.48E-04 |
| Gm15230       | 1  | 0 | 1  | 6781   | 1.47E-04 |
| Osr1          | 1  | 0 | 1  | 7058   | 1.42E-04 |
| Fgg           | 0  | 1 | 1  | 7195   | 1.39E-04 |
| Iah1          | 0  | 1 | 1  | 7214   | 1.39E-04 |
| 1700087M22Rik | 0  | 1 | 1  | 7324   | 1.37E-04 |
| Gm5878        | 1  | 1 | 2  | 14710  | 1.36E-04 |
| Fga           | 0  | 1 | 1  | 7463   | 1.34E-04 |
| Errfi1        | 2  | 0 | 2  | 14974  | 1.34E-04 |
| Ctf2          | 1  | 0 | 1  | 7511   | 1.33E-04 |
| Mul1          | 0  | 1 | 1  | 7595   | 1.32E-04 |
| Lmod2         | 1  | 0 | 1  | 7644   | 1.31E-04 |
| Tlx1          | 1  | 0 | 1  | 7708   | 1.30E-04 |
| Sncb          | 1  | 0 | 1  | 7736   | 1.29E-04 |
| Gbp11         | 3  | 0 | 3  | 23431  | 1.28E-04 |
| Lhx1          | 1  | 0 | 1  | 8039   | 1.24E-04 |
| Ctsa          | 1  | 0 | 1  | 8160   | 1.23E-04 |
| Trib1         | 0  | 1 | 1  | 8201   | 1.22E-04 |

|               |   |   |   |       |          |
|---------------|---|---|---|-------|----------|
| Pcsk4         | 1 | 0 | 1 | 8216  | 1.22E-04 |
| Mgst1         | 2 | 0 | 2 | 16440 | 1.22E-04 |
| Dnajb2        | 1 | 0 | 1 | 8340  | 1.20E-04 |
| Irf1          | 0 | 1 | 1 | 8361  | 1.20E-04 |
| 1700021L23Rik | 0 | 1 | 1 | 8625  | 1.16E-04 |
| Ngdn          | 1 | 0 | 1 | 8682  | 1.15E-04 |
| Moxd2         | 1 | 0 | 1 | 8701  | 1.15E-04 |
| Paccin3       | 1 | 0 | 1 | 8726  | 1.15E-04 |
| Ssr2          | 0 | 1 | 1 | 8727  | 1.15E-04 |
| Rgp1          | 0 | 1 | 1 | 8773  | 1.14E-04 |
| Klhl21        | 0 | 1 | 1 | 8878  | 1.13E-04 |
| Herpud1       | 0 | 1 | 1 | 8940  | 1.12E-04 |
| Fxyd7         | 0 | 1 | 1 | 8946  | 1.12E-04 |
| Mex3a         | 1 | 0 | 1 | 9002  | 1.11E-04 |
| Psg22         | 1 | 0 | 1 | 9159  | 1.09E-04 |
| Fgf6          | 0 | 1 | 1 | 9177  | 1.09E-04 |
| Gm14965       | 1 | 0 | 1 | 9207  | 1.09E-04 |
| RP23-95K12.9  | 0 | 1 | 1 | 9226  | 1.08E-04 |
| Vkorc1        | 0 | 1 | 1 | 9228  | 1.08E-04 |
| Zbtb32        | 1 | 0 | 1 | 9229  | 1.08E-04 |
| Amhr2         | 0 | 1 | 1 | 9264  | 1.08E-04 |
| Gpx4          | 1 | 0 | 1 | 9274  | 1.08E-04 |
| Rusc1         | 1 | 0 | 1 | 9383  | 1.07E-04 |
| Btf3l4        | 0 | 2 | 2 | 19320 | 1.04E-04 |
| Glul          | 1 | 0 | 1 | 9780  | 1.02E-04 |
| Upk3bl        | 0 | 1 | 1 | 9835  | 1.02E-04 |
| Zfp791        | 0 | 1 | 1 | 9991  | 1.00E-04 |
| Slc25a29      | 0 | 1 | 1 | 10011 | 9.99E-05 |
| Lin7c         | 0 | 1 | 1 | 10151 | 9.85E-05 |
| Ifi35         | 0 | 1 | 1 | 10292 | 9.72E-05 |
| G6pc          | 0 | 1 | 1 | 10343 | 9.67E-05 |
| Klrg2         | 0 | 1 | 1 | 10580 | 9.45E-05 |
| Kcnk6         | 0 | 1 | 1 | 10595 | 9.44E-05 |
| Irs2          | 0 | 2 | 2 | 21479 | 9.31E-05 |
| Cd3e          | 0 | 1 | 1 | 10848 | 9.22E-05 |
| Glt8d1        | 0 | 1 | 1 | 11049 | 9.05E-05 |
| C030005K06Rik | 0 | 1 | 1 | 11115 | 9.00E-05 |
| Pkd2l2        | 0 | 3 | 3 | 33367 | 8.99E-05 |
| Bscl2         | 0 | 1 | 1 | 11217 | 8.92E-05 |
| Smarcd1       | 1 | 0 | 1 | 11709 | 8.54E-05 |

|               |   |   |   |       |          |
|---------------|---|---|---|-------|----------|
| Gm11944       | 0 | 1 | 1 | 11727 | 8.53E-05 |
| Pithd1        | 1 | 0 | 1 | 11805 | 8.47E-05 |
| Gzf1          | 1 | 0 | 1 | 11927 | 8.38E-05 |
| Tma16         | 1 | 0 | 1 | 12201 | 8.20E-05 |
| Timm17a       | 0 | 1 | 1 | 12247 | 8.17E-05 |
| Twf2          | 0 | 1 | 1 | 12280 | 8.14E-05 |
| Cox6c         | 0 | 1 | 1 | 12361 | 8.09E-05 |
| 9630028B13Rik | 1 | 0 | 1 | 12463 | 8.02E-05 |
| D330050G23Rik | 0 | 1 | 1 | 12640 | 7.91E-05 |
| Zfp783        | 1 | 0 | 1 | 12743 | 7.85E-05 |
| 4933402J07Rik | 2 | 0 | 2 | 25572 | 7.82E-05 |
| Egfl7         | 1 | 0 | 1 | 13107 | 7.63E-05 |
| AC107704.2    | 0 | 1 | 1 | 13177 | 7.59E-05 |
| Scd2          | 1 | 0 | 1 | 13189 | 7.58E-05 |
| Scd1          | 1 | 0 | 1 | 13259 | 7.54E-05 |
| Plac1l        | 1 | 0 | 1 | 13281 | 7.53E-05 |
| Bzw1          | 1 | 0 | 1 | 13413 | 7.46E-05 |
| Pipox         | 1 | 0 | 1 | 13482 | 7.42E-05 |
| Htra4         | 0 | 1 | 1 | 13512 | 7.40E-05 |
| Gfap          | 0 | 1 | 1 | 13577 | 7.37E-05 |
| Cga           | 1 | 0 | 1 | 13592 | 7.36E-05 |
| Pms2          | 0 | 2 | 2 | 27346 | 7.31E-05 |
| Rhbdd2        | 0 | 1 | 1 | 13831 | 7.23E-05 |
| Cstad         | 1 | 0 | 1 | 13904 | 7.19E-05 |
| Ptpn18        | 1 | 0 | 1 | 14030 | 7.13E-05 |
| Gm11932       | 1 | 0 | 1 | 14075 | 7.10E-05 |
| Slc25a38      | 0 | 1 | 1 | 14131 | 7.08E-05 |
| Pdcd6         | 0 | 1 | 1 | 14206 | 7.04E-05 |
| Acta2         | 0 | 1 | 1 | 14247 | 7.02E-05 |
| Pzp           | 2 | 1 | 3 | 43154 | 6.95E-05 |
| Gm20499       | 0 | 1 | 1 | 14425 | 6.93E-05 |
| Six4          | 1 | 0 | 1 | 14429 | 6.93E-05 |
| Sdsl          | 0 | 1 | 1 | 14625 | 6.84E-05 |
| Klf5          | 1 | 0 | 1 | 14715 | 6.80E-05 |
| Mfap1a        | 1 | 0 | 1 | 14755 | 6.78E-05 |
| Mfap1a        | 1 | 0 | 1 | 14755 | 6.78E-05 |
| Mfap1a        | 1 | 0 | 1 | 14755 | 6.78E-05 |
| Eef1d         | 1 | 0 | 1 | 14761 | 6.77E-05 |
| Serpina10     | 0 | 1 | 1 | 14770 | 6.77E-05 |
| Clcn2         | 0 | 1 | 1 | 14783 | 6.76E-05 |

|               |   |   |   |       |          |
|---------------|---|---|---|-------|----------|
| Skp1a         | 1 | 0 | 1 | 14864 | 6.73E-05 |
| Tmem218       | 0 | 1 | 1 | 14878 | 6.72E-05 |
| Dnase1l3      | 2 | 0 | 2 | 30041 | 6.66E-05 |
| Tfap4         | 0 | 1 | 1 | 15060 | 6.64E-05 |
| Lrrtm1        | 0 | 1 | 1 | 15103 | 6.62E-05 |
| Pex26         | 0 | 1 | 1 | 15171 | 6.59E-05 |
| Tmem38a       | 1 | 0 | 1 | 15180 | 6.59E-05 |
| Pigx          | 0 | 1 | 1 | 15319 | 6.53E-05 |
| Gm10658       | 1 | 0 | 1 | 15337 | 6.52E-05 |
| Cyp4a10       | 0 | 1 | 1 | 15386 | 6.50E-05 |
| 4930564G21Rik | 0 | 1 | 1 | 15637 | 6.40E-05 |
| Crot          | 1 | 1 | 2 | 31292 | 6.39E-05 |
| Unc45a        | 1 | 0 | 1 | 15714 | 6.36E-05 |
| Lass1         | 1 | 0 | 1 | 15801 | 6.33E-05 |
| Gdf1          | 1 | 0 | 1 | 15818 | 6.32E-05 |
| Ppp1r10       | 1 | 0 | 1 | 15848 | 6.31E-05 |
| Gm14554       | 0 | 1 | 1 | 15872 | 6.30E-05 |
| Spo11         | 1 | 0 | 1 | 15877 | 6.30E-05 |
| Rasgrp2       | 1 | 0 | 1 | 15877 | 6.30E-05 |
| Ubqln4        | 0 | 1 | 1 | 16010 | 6.25E-05 |
| Flywch1       | 1 | 0 | 1 | 16169 | 6.18E-05 |
| Timm44        | 1 | 0 | 1 | 16183 | 6.18E-05 |
| Lamp1         | 1 | 0 | 1 | 16204 | 6.17E-05 |
| Lsm6          | 0 | 1 | 1 | 16276 | 6.14E-05 |
| Proc          | 0 | 1 | 1 | 16442 | 6.08E-05 |
| Dffa          | 1 | 0 | 1 | 16502 | 6.06E-05 |
| Acat3         | 0 | 1 | 1 | 16570 | 6.04E-05 |
| Iigp1         | 1 | 0 | 1 | 16599 | 6.02E-05 |
| Clptm1l       | 0 | 1 | 1 | 16638 | 6.01E-05 |
| Amdhd1        | 0 | 1 | 1 | 16696 | 5.99E-05 |
| Gm15418       | 0 | 1 | 1 | 16749 | 5.97E-05 |
| A130030D18Rik | 0 | 1 | 1 | 16831 | 5.94E-05 |
| Tnfrsf10b     | 0 | 1 | 1 | 16932 | 5.91E-05 |
| Zfp92         | 0 | 1 | 1 | 17290 | 5.78E-05 |
| Wdr34         | 0 | 1 | 1 | 17336 | 5.77E-05 |
| Elf4          | 1 | 2 | 3 | 52087 | 5.76E-05 |
| Zfp9          | 1 | 0 | 1 | 17371 | 5.76E-05 |
| Sidt2         | 0 | 1 | 1 | 17391 | 5.75E-05 |
| Tomm34        | 1 | 0 | 1 | 17630 | 5.67E-05 |
| Ckap2         | 0 | 1 | 1 | 17668 | 5.66E-05 |

|               |   |   |   |       |          |
|---------------|---|---|---|-------|----------|
| Cd97          | 1 | 0 | 1 | 18076 | 5.53E-05 |
| D1Ertd622e    | 0 | 1 | 1 | 18172 | 5.50E-05 |
| Six3          | 1 | 0 | 1 | 18206 | 5.49E-05 |
| Ei24          | 1 | 0 | 1 | 18235 | 5.48E-05 |
| Agbl5         | 1 | 0 | 1 | 18272 | 5.47E-05 |
| Ciapi1        | 0 | 1 | 1 | 18541 | 5.39E-05 |
| Otud3         | 1 | 0 | 1 | 18567 | 5.39E-05 |
| AC163993.1    | 0 | 1 | 1 | 18838 | 5.31E-05 |
| Mgat1         | 0 | 1 | 1 | 18840 | 5.31E-05 |
| Chadl         | 0 | 1 | 1 | 18992 | 5.27E-05 |
| 9330159F19Rik | 1 | 0 | 1 | 19137 | 5.23E-05 |
| Csf1          | 1 | 0 | 1 | 19422 | 5.15E-05 |
| Srr           | 0 | 1 | 1 | 19590 | 5.10E-05 |
| Pcmt2         | 1 | 0 | 1 | 19608 | 5.10E-05 |
| Aagab         | 1 | 1 | 2 | 39235 | 5.10E-05 |
| Pitx2         | 0 | 1 | 1 | 19714 | 5.07E-05 |
| Mtss1l        | 0 | 1 | 1 | 19925 | 5.02E-05 |
| Ttll12        | 1 | 0 | 1 | 20039 | 4.99E-05 |
| Ttc5          | 0 | 1 | 1 | 20104 | 4.97E-05 |
| Papd5         | 2 | 1 | 3 | 60510 | 4.96E-05 |
| Gm10974       | 0 | 1 | 1 | 20405 | 4.90E-05 |
| Hnrnpd        | 1 | 0 | 1 | 20513 | 4.87E-05 |
| Tyw3          | 0 | 1 | 1 | 20585 | 4.86E-05 |
| Xlr           | 1 | 0 | 1 | 20589 | 4.86E-05 |
| Neat1         | 1 | 0 | 1 | 20771 | 4.81E-05 |
| Map2k3        | 1 | 0 | 1 | 20779 | 4.81E-05 |
| Def6          | 1 | 0 | 1 | 20831 | 4.80E-05 |
| 9330154K18Rik | 0 | 1 | 1 | 20863 | 4.79E-05 |
| Jag2          | 0 | 1 | 1 | 20906 | 4.78E-05 |
| Smyd2         | 1 | 1 | 2 | 41872 | 4.78E-05 |
| Tbc1d25       | 0 | 1 | 1 | 21710 | 4.61E-05 |
| Lrrc41        | 1 | 0 | 1 | 21775 | 4.59E-05 |
| Ppp1r36       | 0 | 1 | 1 | 21875 | 4.57E-05 |
| Nr5a1         | 1 | 0 | 1 | 21887 | 4.57E-05 |
| Cdkl1         | 1 | 1 | 2 | 43860 | 4.56E-05 |
| Lipg          | 0 | 1 | 1 | 21942 | 4.56E-05 |
| Thumpd3       | 1 | 0 | 1 | 22049 | 4.54E-05 |
| Erb3          | 0 | 1 | 1 | 22130 | 4.52E-05 |
| Sbk1          | 0 | 1 | 1 | 22381 | 4.47E-05 |
| Manea         | 0 | 1 | 1 | 22386 | 4.47E-05 |

|               |   |   |   |       |          |
|---------------|---|---|---|-------|----------|
| Them4         | 0 | 1 | 1 | 22452 | 4.45E-05 |
| Wnt9b         | 1 | 0 | 1 | 22458 | 4.45E-05 |
| Rab11a        | 1 | 0 | 1 | 22460 | 4.45E-05 |
| Parl          | 0 | 1 | 1 | 22568 | 4.43E-05 |
| Tnfrsf13b     | 1 | 0 | 1 | 22618 | 4.42E-05 |
| Nus1          | 0 | 1 | 1 | 22646 | 4.42E-05 |
| AC127355.1    | 0 | 1 | 1 | 22718 | 4.40E-05 |
| Yipf1         | 1 | 1 | 2 | 45461 | 4.40E-05 |
| Srek1         | 1 | 0 | 1 | 22890 | 4.37E-05 |
| Ccdc152       | 0 | 1 | 1 | 22900 | 4.37E-05 |
| 2210417K05Rik | 0 | 1 | 1 | 23112 | 4.33E-05 |
| Morf4l1       | 0 | 1 | 1 | 23150 | 4.32E-05 |
| Morf4l1       | 0 | 1 | 1 | 23150 | 4.32E-05 |
| Arhgef16      | 1 | 0 | 1 | 23191 | 4.31E-05 |
| Tyk2          | 1 | 0 | 1 | 23278 | 4.30E-05 |
| Nipal1        | 0 | 1 | 1 | 23283 | 4.29E-05 |
| Slc35f2       | 0 | 2 | 2 | 46627 | 4.29E-05 |
| Ltf           | 1 | 0 | 1 | 23475 | 4.26E-05 |
| Srebf1        | 0 | 1 | 1 | 23493 | 4.26E-05 |
| Rbp1          | 0 | 1 | 1 | 23591 | 4.24E-05 |
| Gpld1         | 1 | 1 | 2 | 47602 | 4.20E-05 |
| Bcl6          | 0 | 1 | 1 | 23801 | 4.20E-05 |
| Tmpo          | 1 | 0 | 1 | 24012 | 4.16E-05 |
| Mtmr4         | 0 | 1 | 1 | 24141 | 4.14E-05 |
| Kng1          | 1 | 0 | 1 | 24204 | 4.13E-05 |
| Sh3yl1        | 1 | 1 | 2 | 48495 | 4.12E-05 |
| Hbp1          | 1 | 0 | 1 | 24282 | 4.12E-05 |
| Srsf12        | 1 | 0 | 1 | 24350 | 4.11E-05 |
| Bst1          | 0 | 1 | 1 | 24362 | 4.10E-05 |
| Haus8         | 0 | 1 | 1 | 24374 | 4.10E-05 |
| L3mbtl2       | 0 | 1 | 1 | 24427 | 4.09E-05 |
| Phldb1        | 0 | 2 | 2 | 48895 | 4.09E-05 |
| Zfp787        | 0 | 1 | 1 | 24483 | 4.08E-05 |
| Atp5c1        | 0 | 1 | 1 | 24495 | 4.08E-05 |
| Fam123b       | 1 | 0 | 1 | 24555 | 4.07E-05 |
| Slc17a6       | 0 | 2 | 2 | 49296 | 4.06E-05 |
| Celsr2        | 1 | 0 | 1 | 24702 | 4.05E-05 |
| Gsta3         | 1 | 0 | 1 | 24773 | 4.04E-05 |
| Mical3        | 2 | 1 | 3 | 74369 | 4.03E-05 |
| Cyth4         | 1 | 0 | 1 | 24973 | 4.00E-05 |



|               |   |   |   |       |          |
|---------------|---|---|---|-------|----------|
| Gm2245        | 1 | 1 | 2 | 49963 | 4.00E-05 |
| Elk4          | 0 | 1 | 1 | 25006 | 4.00E-05 |
| Bcl9          | 1 | 0 | 1 | 25185 | 3.97E-05 |
| Ulk1          | 1 | 0 | 1 | 25610 | 3.90E-05 |
| Palb2         | 1 | 0 | 1 | 25685 | 3.89E-05 |
| Gm12592       | 0 | 1 | 1 | 25753 | 3.88E-05 |
| 4632428N05Rik | 0 | 1 | 1 | 25834 | 3.87E-05 |
| Nucks1        | 1 | 0 | 1 | 25864 | 3.87E-05 |
| Brd8          | 1 | 0 | 1 | 25987 | 3.85E-05 |
| Havcr2        | 1 | 0 | 1 | 26321 | 3.80E-05 |
| Cryz          | 0 | 1 | 1 | 26472 | 3.78E-05 |
| Fam105a       | 0 | 1 | 1 | 26472 | 3.78E-05 |
| Eif4e2        | 0 | 1 | 1 | 26575 | 3.76E-05 |
| Szrd1         | 1 | 0 | 1 | 26775 | 3.73E-05 |
| AC119212.1    | 1 | 0 | 1 | 26818 | 3.73E-05 |
| Slc36a3       | 0 | 1 | 1 | 26894 | 3.72E-05 |
| Ehd3          | 0 | 1 | 1 | 27253 | 3.67E-05 |
| Aida          | 0 | 1 | 1 | 27442 | 3.64E-05 |
| Slc6a14       | 1 | 0 | 1 | 27460 | 3.64E-05 |
| Btd           | 0 | 1 | 1 | 27552 | 3.63E-05 |
| Gtf2h1        | 0 | 1 | 1 | 27698 | 3.61E-05 |
| Cul5          | 1 | 1 | 2 | 55433 | 3.61E-05 |
| Trim62        | 0 | 1 | 1 | 27749 | 3.60E-05 |
| Pi4k2b        | 1 | 0 | 1 | 27758 | 3.60E-05 |
| Ccdc125       | 0 | 1 | 1 | 27760 | 3.60E-05 |
| Cr1l          | 0 | 1 | 1 | 27782 | 3.60E-05 |
| Cyp46a1       | 0 | 1 | 1 | 27855 | 3.59E-05 |
| Mep1b         | 1 | 0 | 1 | 27856 | 3.59E-05 |
| Tnni1         | 1 | 0 | 1 | 27925 | 3.58E-05 |
| Rasa4         | 1 | 0 | 1 | 27945 | 3.58E-05 |
| Mybl2         | 0 | 1 | 1 | 27953 | 3.58E-05 |
| Rdh10         | 1 | 0 | 1 | 27961 | 3.58E-05 |
| Dhcr24        | 1 | 0 | 1 | 28076 | 3.56E-05 |
| Spata18       | 1 | 0 | 1 | 28105 | 3.56E-05 |
| Bora          | 0 | 1 | 1 | 28111 | 3.56E-05 |
| Kpnb1         | 1 | 0 | 1 | 28168 | 3.55E-05 |
| Tpm3          | 0 | 1 | 1 | 28254 | 3.54E-05 |
| Smad7         | 0 | 1 | 1 | 28407 | 3.52E-05 |
| CT033755.1    | 0 | 1 | 1 | 28411 | 3.52E-05 |
| Txndc5        | 1 | 0 | 1 | 28552 | 3.50E-05 |

|               |   |   |   |       |          |
|---------------|---|---|---|-------|----------|
| Slc30a6       | 0 | 1 | 1 | 28622 | 3.49E-05 |
| Ddx11         | 1 | 0 | 1 | 28648 | 3.49E-05 |
| Ube2d3        | 0 | 1 | 1 | 28882 | 3.46E-05 |
| Gm17135       | 1 | 1 | 2 | 58415 | 3.42E-05 |
| Adck4         | 0 | 1 | 1 | 29230 | 3.42E-05 |
| Rfwd3         | 1 | 0 | 1 | 29279 | 3.42E-05 |
| Pkn1          | 1 | 0 | 1 | 29418 | 3.40E-05 |
| Pcbp2         | 1 | 0 | 1 | 29428 | 3.40E-05 |
| Cirh1a        | 1 | 0 | 1 | 29454 | 3.40E-05 |
| Stard10       | 0 | 1 | 1 | 29541 | 3.39E-05 |
| Cda           | 1 | 0 | 1 | 29569 | 3.38E-05 |
| Hip1r         | 1 | 0 | 1 | 29584 | 3.38E-05 |
| Mef2d         | 1 | 0 | 1 | 29715 | 3.37E-05 |
| Stk17b        | 1 | 0 | 1 | 29719 | 3.36E-05 |
| 4930556N13Rik | 0 | 1 | 1 | 29792 | 3.36E-05 |
| Tfap2b        | 1 | 0 | 1 | 29821 | 3.35E-05 |
| Snx9          | 0 | 3 | 3 | 89706 | 3.34E-05 |
| Sgol2         | 1 | 0 | 1 | 29929 | 3.34E-05 |
| Tpcn2         | 0 | 1 | 1 | 30005 | 3.33E-05 |
| Ncaph         | 0 | 1 | 1 | 30146 | 3.32E-05 |
| Slc25a33      | 1 | 0 | 1 | 30242 | 3.31E-05 |
| Cd160         | 1 | 0 | 1 | 30589 | 3.27E-05 |
| Ncapg         | 1 | 0 | 1 | 30623 | 3.27E-05 |
| Trpm4         | 0 | 1 | 1 | 30626 | 3.27E-05 |
| Rpap3         | 0 | 1 | 1 | 30718 | 3.26E-05 |
| Clca1         | 0 | 1 | 1 | 31301 | 3.19E-05 |
| Oplah         | 1 | 0 | 1 | 31419 | 3.18E-05 |
| Dnajb4        | 1 | 0 | 1 | 31769 | 3.15E-05 |
| Snta1         | 0 | 1 | 1 | 31787 | 3.15E-05 |
| Prmt10        | 0 | 1 | 1 | 31942 | 3.13E-05 |
| Zfhx2         | 0 | 1 | 1 | 32063 | 3.12E-05 |
| Arhgap27      | 1 | 0 | 1 | 32196 | 3.11E-05 |
| Ddx42         | 1 | 0 | 1 | 32214 | 3.10E-05 |
| Slc4a7        | 1 | 2 | 3 | 96919 | 3.10E-05 |
| Dbx2          | 0 | 1 | 1 | 32398 | 3.09E-05 |
| Ythdc1        | 1 | 0 | 1 | 32439 | 3.08E-05 |
| Ston1         | 0 | 2 | 2 | 64903 | 3.08E-05 |
| Scube3        | 1 | 0 | 1 | 32537 | 3.07E-05 |
| Pvrl2         | 0 | 1 | 1 | 32930 | 3.04E-05 |
| Tmx3          | 0 | 1 | 1 | 33114 | 3.02E-05 |

|               |   |   |   |       |          |
|---------------|---|---|---|-------|----------|
| Stk30         | 1 | 0 | 1 | 33142 | 3.02E-05 |
| Vmn2r17       | 0 | 1 | 1 | 33375 | 3.00E-05 |
| Sap30bp       | 1 | 0 | 1 | 33444 | 2.99E-05 |
| Sap30bp       | 1 | 0 | 1 | 33444 | 2.99E-05 |
| Tmem39a       | 0 | 1 | 1 | 33465 | 2.99E-05 |
| Trmt13        | 0 | 1 | 1 | 33495 | 2.99E-05 |
| BC046331      | 1 | 0 | 1 | 33539 | 2.98E-05 |
| Kras          | 0 | 1 | 1 | 33541 | 2.98E-05 |
| Zfp143        | 1 | 0 | 1 | 33691 | 2.97E-05 |
| Anapc5        | 0 | 1 | 1 | 33871 | 2.95E-05 |
| Cyp3a59       | 1 | 0 | 1 | 34028 | 2.94E-05 |
| P4ha3         | 0 | 1 | 1 | 34180 | 2.93E-05 |
| 3110099E03Rik | 1 | 0 | 1 | 34232 | 2.92E-05 |
| Dhx8          | 0 | 1 | 1 | 34440 | 2.90E-05 |
| 2700097O09Rik | 0 | 1 | 1 | 34450 | 2.90E-05 |
| Afm           | 0 | 1 | 1 | 34612 | 2.89E-05 |
| Gm13261       | 0 | 1 | 1 | 34759 | 2.88E-05 |
| Csnk1a1       | 1 | 0 | 1 | 34788 | 2.87E-05 |
| Nfic          | 0 | 1 | 1 | 34820 | 2.87E-05 |
| Tmco3         | 1 | 0 | 1 | 34912 | 2.86E-05 |
| Sin3b         | 1 | 0 | 1 | 34916 | 2.86E-05 |
| Slc47a1       | 1 | 0 | 1 | 34945 | 2.86E-05 |
| Ubxn4         | 0 | 1 | 1 | 35197 | 2.84E-05 |
| Dync1li1      | 0 | 1 | 1 | 35513 | 2.82E-05 |
| D6Wsu163e     | 0 | 1 | 1 | 35739 | 2.80E-05 |
| Ppm1d         | 1 | 0 | 1 | 35823 | 2.79E-05 |
| Sass6         | 0 | 1 | 1 | 35977 | 2.78E-05 |
| Gpa33         | 0 | 1 | 1 | 36273 | 2.76E-05 |
| Clpx          | 1 | 0 | 1 | 36399 | 2.75E-05 |
| Xylb          | 0 | 1 | 1 | 36417 | 2.75E-05 |
| 5031414D18Rik | 0 | 1 | 1 | 36506 | 2.74E-05 |
| lws1          | 1 | 0 | 1 | 36598 | 2.73E-05 |
| Bdh1          | 1 | 0 | 1 | 36622 | 2.73E-05 |
| 1700084C06Rik | 1 | 0 | 1 | 36639 | 2.73E-05 |
| Recql         | 0 | 1 | 1 | 36746 | 2.72E-05 |
| Dbt           | 0 | 1 | 1 | 36907 | 2.71E-05 |
| Slc25a25      | 0 | 1 | 1 | 36959 | 2.71E-05 |
| Dhx36         | 0 | 1 | 1 | 36966 | 2.71E-05 |
| Polr3g        | 1 | 0 | 1 | 37171 | 2.69E-05 |
| Ctse          | 1 | 0 | 1 | 37198 | 2.69E-05 |

|               |   |   |   |       |          |
|---------------|---|---|---|-------|----------|
| Cyp2b9        | 0 | 1 | 1 | 37251 | 2.68E-05 |
| Bai2          | 1 | 0 | 1 | 37764 | 2.65E-05 |
| Terf1         | 0 | 1 | 1 | 37771 | 2.65E-05 |
| Moap1         | 1 | 0 | 1 | 37836 | 2.64E-05 |
| Moap1         | 1 | 0 | 1 | 37836 | 2.64E-05 |
| Dupd1         | 0 | 1 | 1 | 37995 | 2.63E-05 |
| AC120136.1    | 0 | 1 | 1 | 38405 | 2.60E-05 |
| Gldc          | 2 | 0 | 2 | 76970 | 2.60E-05 |
| Txnrd1        | 1 | 0 | 1 | 38519 | 2.60E-05 |
| Ranbp3        | 0 | 1 | 1 | 38545 | 2.59E-05 |
| Dnajc10       | 0 | 1 | 1 | 38578 | 2.59E-05 |
| Cfi           | 0 | 1 | 1 | 38590 | 2.59E-05 |
| Copb1         | 1 | 0 | 1 | 39122 | 2.56E-05 |
| 4930556J24Rik | 1 | 0 | 1 | 39238 | 2.55E-05 |
| 1500003O03Rik | 0 | 1 | 1 | 39331 | 2.54E-05 |
| 1500003O03Rik | 0 | 1 | 1 | 39331 | 2.54E-05 |
| Themis3       | 0 | 1 | 1 | 39370 | 2.54E-05 |
| Drg1          | 1 | 1 | 2 | 79056 | 2.53E-05 |
| Rab11fip5     | 0 | 1 | 1 | 39672 | 2.52E-05 |
| Lasp1         | 1 | 0 | 1 | 39765 | 2.51E-05 |
| Copa          | 1 | 0 | 1 | 39802 | 2.51E-05 |
| Mis18bp1      | 1 | 0 | 1 | 39871 | 2.51E-05 |
| Tcea1         | 0 | 1 | 1 | 40096 | 2.49E-05 |
| Hells         | 0 | 1 | 1 | 40137 | 2.49E-05 |
| 4933403F05Rik | 1 | 0 | 1 | 40147 | 2.49E-05 |
| Rab11fip3     | 1 | 1 | 2 | 80374 | 2.49E-05 |
| A1cf          | 0 | 2 | 2 | 80646 | 2.48E-05 |
| Ptges         | 1 | 0 | 1 | 40393 | 2.48E-05 |
| Rps6ka1       | 1 | 0 | 1 | 40508 | 2.47E-05 |
| Iqce          | 0 | 1 | 1 | 40552 | 2.47E-05 |
| Pitpna        | 1 | 0 | 1 | 40708 | 2.46E-05 |
| Plg           | 1 | 0 | 1 | 40776 | 2.45E-05 |
| 41705         | 0 | 1 | 1 | 40790 | 2.45E-05 |
| Fhl2          | 0 | 1 | 1 | 40888 | 2.45E-05 |
| Zfp133-ps     | 0 | 1 | 1 | 40988 | 2.44E-05 |
| Cpb2          | 1 | 0 | 1 | 41265 | 2.42E-05 |
| Fermt1        | 1 | 0 | 1 | 41518 | 2.41E-05 |
| Ccdc123       | 0 | 1 | 1 | 41655 | 2.40E-05 |
| Fyb           | 1 | 1 | 2 | 83443 | 2.40E-05 |
| Ccdc13        | 1 | 0 | 1 | 41835 | 2.39E-05 |

|               |   |   |   |        |          |
|---------------|---|---|---|--------|----------|
| Nprl3         | 0 | 1 | 1 | 42080  | 2.38E-05 |
| Nup107        | 1 | 0 | 1 | 42082  | 2.38E-05 |
| Eif4enif1     | 1 | 0 | 1 | 42197  | 2.37E-05 |
| Stat1         | 1 | 0 | 1 | 42428  | 2.36E-05 |
| Chka          | 0 | 1 | 1 | 42597  | 2.35E-05 |
| Tmem184b      | 0 | 1 | 1 | 42620  | 2.35E-05 |
| Cars          | 1 | 0 | 1 | 42861  | 2.33E-05 |
| Heatr1        | 0 | 1 | 1 | 43280  | 2.31E-05 |
| Nab1          | 0 | 1 | 1 | 43386  | 2.30E-05 |
| Dcaf17        | 0 | 1 | 1 | 43815  | 2.28E-05 |
| Pou2f3        | 1 | 1 | 2 | 87742  | 2.28E-05 |
| Mfap3l        | 0 | 1 | 1 | 43903  | 2.28E-05 |
| Tfpi          | 1 | 0 | 1 | 43921  | 2.28E-05 |
| Ccdc68        | 1 | 0 | 1 | 44059  | 2.27E-05 |
| Lgi1          | 0 | 1 | 1 | 44158  | 2.26E-05 |
| Pkd2l1        | 1 | 0 | 1 | 44806  | 2.23E-05 |
| Cldn14        | 1 | 1 | 2 | 89807  | 2.23E-05 |
| Tdeanc2       | 1 | 0 | 1 | 44962  | 2.22E-05 |
| Ccdc53        | 1 | 0 | 1 | 45056  | 2.22E-05 |
| Grhl1         | 1 | 0 | 1 | 45105  | 2.22E-05 |
| BC057022      | 0 | 1 | 1 | 45205  | 2.21E-05 |
| Gtf2e2        | 1 | 0 | 1 | 45260  | 2.21E-05 |
| Dcun1d1       | 1 | 0 | 1 | 45341  | 2.21E-05 |
| 2510009E07Rik | 0 | 1 | 1 | 45621  | 2.19E-05 |
| Ubr4          | 3 | 0 | 3 | 136980 | 2.19E-05 |
| Dlec1         | 1 | 0 | 1 | 45769  | 2.18E-05 |
| Secisbp2l     | 0 | 1 | 1 | 45885  | 2.18E-05 |
| Cdh3          | 1 | 0 | 1 | 45996  | 2.17E-05 |
| Ppl           | 1 | 0 | 1 | 46191  | 2.16E-05 |
| Tsc22d1       | 1 | 1 | 2 | 92805  | 2.16E-05 |
| Arih2         | 1 | 0 | 1 | 46439  | 2.15E-05 |
| Slc20a2       | 0 | 2 | 2 | 92908  | 2.15E-05 |
| Gmps          | 0 | 1 | 1 | 46474  | 2.15E-05 |
| Sidt1         | 0 | 2 | 2 | 93017  | 2.15E-05 |
| Npl           | 1 | 0 | 1 | 46699  | 2.14E-05 |
| Pdia5         | 1 | 1 | 2 | 93561  | 2.14E-05 |
| Gm15623       | 0 | 1 | 1 | 46819  | 2.14E-05 |
| Usp33         | 0 | 1 | 1 | 47135  | 2.12E-05 |
| Pde4a         | 0 | 1 | 1 | 47535  | 2.10E-05 |
| Ptchd2        | 0 | 1 | 1 | 47702  | 2.10E-05 |

|            |   |   |   |        |          |
|------------|---|---|---|--------|----------|
| Prokr2     | 1 | 0 | 1 | 47715  | 2.10E-05 |
| Sgsm2      | 0 | 1 | 1 | 47800  | 2.09E-05 |
| Tnfrsf8    | 1 | 0 | 1 | 48028  | 2.08E-05 |
| Snx4       | 1 | 0 | 1 | 48107  | 2.08E-05 |
| Gm12724    | 1 | 0 | 1 | 48811  | 2.05E-05 |
| Snx8       | 0 | 1 | 1 | 48948  | 2.04E-05 |
| Prex1      | 0 | 3 | 3 | 147491 | 2.03E-05 |
| Fxr1       | 0 | 1 | 1 | 49264  | 2.03E-05 |
| Golga1     | 1 | 0 | 1 | 49281  | 2.03E-05 |
| Pxn        | 1 | 0 | 1 | 49312  | 2.03E-05 |
| Eci2       | 1 | 0 | 1 | 49347  | 2.03E-05 |
| Lin9       | 1 | 0 | 1 | 49369  | 2.03E-05 |
| Dpp8       | 0 | 1 | 1 | 50193  | 1.99E-05 |
| L3mbtl3    | 2 | 0 | 2 | 100718 | 1.99E-05 |
| Ass1       | 1 | 0 | 1 | 50466  | 1.98E-05 |
| Paxip1     | 1 | 0 | 1 | 50673  | 1.97E-05 |
| Tada2a     | 1 | 0 | 1 | 50681  | 1.97E-05 |
| Plcx2      | 0 | 1 | 1 | 50956  | 1.96E-05 |
| Car5b      | 0 | 1 | 1 | 51176  | 1.95E-05 |
| Gm12147    | 0 | 1 | 1 | 51298  | 1.95E-05 |
| Ece1       | 1 | 1 | 2 | 102993 | 1.94E-05 |
| Cdc40      | 0 | 1 | 1 | 51518  | 1.94E-05 |
| Dcps       | 0 | 1 | 1 | 51654  | 1.94E-05 |
| Agbl2      | 1 | 0 | 1 | 51711  | 1.93E-05 |
| Arhgap5    | 1 | 0 | 1 | 51776  | 1.93E-05 |
| Btbd16     | 1 | 0 | 1 | 51829  | 1.93E-05 |
| Fam176a    | 1 | 0 | 1 | 52057  | 1.92E-05 |
| Ptpn22     | 1 | 0 | 1 | 52453  | 1.91E-05 |
| Txnrd2     | 1 | 0 | 1 | 52657  | 1.90E-05 |
| Dnmt1      | 1 | 0 | 1 | 52683  | 1.90E-05 |
| Rsph10b2   | 1 | 0 | 1 | 52685  | 1.90E-05 |
| Slc12a7    | 0 | 1 | 1 | 53047  | 1.89E-05 |
| Sel1l3     | 1 | 1 | 2 | 106369 | 1.88E-05 |
| Cry1       | 0 | 1 | 1 | 53353  | 1.87E-05 |
| Src        | 0 | 1 | 1 | 53419  | 1.87E-05 |
| Neto1      | 1 | 1 | 2 | 106946 | 1.87E-05 |
| Ocrl       | 1 | 0 | 1 | 53482  | 1.87E-05 |
| Fam116a    | 0 | 1 | 1 | 53817  | 1.86E-05 |
| Abcc6      | 1 | 0 | 1 | 53923  | 1.85E-05 |
| AC165259.1 | 0 | 1 | 1 | 54089  | 1.85E-05 |

|               |   |   |   |        |          |
|---------------|---|---|---|--------|----------|
| Enthd1        | 1 | 1 | 2 | 108231 | 1.85E-05 |
| Cps1          | 2 | 0 | 2 | 108234 | 1.85E-05 |
| RP23-377G8.1  | 1 | 0 | 1 | 54317  | 1.84E-05 |
| Cnot10        | 0 | 1 | 1 | 54323  | 1.84E-05 |
| Styk1         | 0 | 1 | 1 | 54454  | 1.84E-05 |
| Sec31a        | 0 | 1 | 1 | 54585  | 1.83E-05 |
| Cmtm8         | 0 | 1 | 1 | 54808  | 1.82E-05 |
| Cyld          | 0 | 1 | 1 | 54918  | 1.82E-05 |
| Rnf182        | 1 | 0 | 1 | 55236  | 1.81E-05 |
| Fam20c        | 0 | 1 | 1 | 55564  | 1.80E-05 |
| Aebp2         | 0 | 1 | 1 | 56024  | 1.78E-05 |
| Usp49         | 0 | 1 | 1 | 56049  | 1.78E-05 |
| AC133083.1    | 1 | 0 | 1 | 56198  | 1.78E-05 |
| Aftph         | 1 | 0 | 1 | 56506  | 1.77E-05 |
| Piwil2        | 0 | 1 | 1 | 56615  | 1.77E-05 |
| Xpnpep3       | 0 | 1 | 1 | 56670  | 1.76E-05 |
| Dennd5b       | 1 | 1 | 2 | 113610 | 1.76E-05 |
| B3gntl1       | 1 | 0 | 1 | 56957  | 1.76E-05 |
| Mapk14        | 0 | 1 | 1 | 57063  | 1.75E-05 |
| Slco1b2       | 0 | 1 | 1 | 57129  | 1.75E-05 |
| Sbno1         | 0 | 1 | 1 | 57213  | 1.75E-05 |
| Ccdc21        | 1 | 0 | 1 | 57255  | 1.75E-05 |
| Nploc4        | 0 | 1 | 1 | 57339  | 1.74E-05 |
| Ctdspl2       | 1 | 0 | 1 | 57642  | 1.73E-05 |
| Ttc18         | 1 | 0 | 1 | 58037  | 1.72E-05 |
| Rhpn2         | 1 | 0 | 1 | 58111  | 1.72E-05 |
| Triobp        | 1 | 0 | 1 | 58144  | 1.72E-05 |
| Osbpl11       | 0 | 1 | 1 | 58241  | 1.72E-05 |
| Bin1          | 0 | 1 | 1 | 58520  | 1.71E-05 |
| Rprd2         | 0 | 1 | 1 | 59081  | 1.69E-05 |
| Ppp4r1        | 1 | 0 | 1 | 59354  | 1.68E-05 |
| Ankrd26       | 0 | 1 | 1 | 59693  | 1.68E-05 |
| Lars          | 0 | 1 | 1 | 59773  | 1.67E-05 |
| Pof1b         | 0 | 1 | 1 | 60221  | 1.66E-05 |
| Eif2ak3       | 1 | 0 | 1 | 60731  | 1.65E-05 |
| Ipo8          | 0 | 1 | 1 | 60785  | 1.65E-05 |
| Msr1          | 1 | 0 | 1 | 60979  | 1.64E-05 |
| Wdtdc1        | 0 | 1 | 1 | 61023  | 1.64E-05 |
| mmu-mir-29b-2 | 0 | 1 | 1 | 61534  | 1.63E-05 |
| Srl           | 0 | 1 | 1 | 61601  | 1.62E-05 |

|               |   |   |   |        |          |
|---------------|---|---|---|--------|----------|
| Sfi1          | 0 | 1 | 1 | 61614  | 1.62E-05 |
| AC112962.1    | 1 | 0 | 1 | 61616  | 1.62E-05 |
| Ctage5        | 1 | 0 | 1 | 61864  | 1.62E-05 |
| Gm15477       | 0 | 1 | 1 | 61948  | 1.61E-05 |
| Uba6          | 0 | 1 | 1 | 62084  | 1.61E-05 |
| Fam169a       | 1 | 0 | 1 | 62235  | 1.61E-05 |
| Aplp2         | 1 | 0 | 1 | 62259  | 1.61E-05 |
| Gm12146       | 0 | 1 | 1 | 62361  | 1.60E-05 |
| Rai2          | 0 | 1 | 1 | 62428  | 1.60E-05 |
| Map3k1        | 1 | 0 | 1 | 62566  | 1.60E-05 |
| H2afy         | 0 | 1 | 1 | 62743  | 1.59E-05 |
| Plekha2       | 1 | 0 | 1 | 63051  | 1.59E-05 |
| Abca8b        | 1 | 0 | 1 | 63656  | 1.57E-05 |
| 4930419G24Rik | 1 | 0 | 1 | 63831  | 1.57E-05 |
| Kctd18        | 1 | 0 | 1 | 63856  | 1.57E-05 |
| Scarb1        | 0 | 1 | 1 | 64008  | 1.56E-05 |
| Lyzl4         | 1 | 0 | 1 | 64254  | 1.56E-05 |
| Zfand6        | 0 | 1 | 1 | 64308  | 1.56E-05 |
| Rpap2         | 0 | 1 | 1 | 64466  | 1.55E-05 |
| AC122546.1    | 1 | 0 | 1 | 64499  | 1.55E-05 |
| Arap1         | 0 | 1 | 1 | 64520  | 1.55E-05 |
| Abca1         | 0 | 2 | 2 | 129109 | 1.55E-05 |
| Uso1          | 1 | 0 | 1 | 64857  | 1.54E-05 |
| Itpr3         | 1 | 0 | 1 | 64920  | 1.54E-05 |
| Limk2         | 1 | 0 | 1 | 64934  | 1.54E-05 |
| Bzw2          | 0 | 1 | 1 | 64980  | 1.54E-05 |
| Acsl1         | 0 | 1 | 1 | 65011  | 1.54E-05 |
| Ddx31         | 0 | 1 | 1 | 65166  | 1.53E-05 |
| Lemd1         | 1 | 0 | 1 | 65946  | 1.52E-05 |
| Zfand4        | 1 | 0 | 1 | 66077  | 1.51E-05 |
| 4430402I18Rik | 1 | 0 | 1 | 66533  | 1.50E-05 |
| Elfn1         | 0 | 1 | 1 | 66769  | 1.50E-05 |
| Mfsd7c        | 1 | 0 | 1 | 67047  | 1.49E-05 |
| Mccc2         | 1 | 0 | 1 | 67107  | 1.49E-05 |
| Ppm1b         | 0 | 1 | 1 | 67251  | 1.49E-05 |
| Tnrc18        | 0 | 1 | 1 | 67283  | 1.49E-05 |
| Adam9         | 1 | 0 | 1 | 67312  | 1.49E-05 |
| Fn1           | 1 | 0 | 1 | 67649  | 1.48E-05 |
| Ddah1         | 2 | 0 | 2 | 135603 | 1.47E-05 |
| Ptpn9         | 1 | 0 | 1 | 67838  | 1.47E-05 |



|               |   |   |   |        |          |
|---------------|---|---|---|--------|----------|
| Lifr          | 1 | 0 | 1 | 67931  | 1.47E-05 |
| Mgat5b        | 1 | 0 | 1 | 68086  | 1.47E-05 |
| Arid4b        | 1 | 1 | 2 | 136372 | 1.47E-05 |
| Slc13a3       | 0 | 1 | 1 | 68203  | 1.47E-05 |
| Pds5b         | 1 | 1 | 2 | 136952 | 1.46E-05 |
| 0610010F05Rik | 1 | 0 | 1 | 68679  | 1.46E-05 |
| Rassf5        | 0 | 1 | 1 | 68849  | 1.45E-05 |
| Smad6         | 0 | 1 | 1 | 68984  | 1.45E-05 |
| Ptpn12        | 0 | 1 | 1 | 69267  | 1.44E-05 |
| D17Wsu92e     | 1 | 0 | 1 | 69327  | 1.44E-05 |
| Gls           | 0 | 1 | 1 | 69785  | 1.43E-05 |
| Dzip3         | 0 | 1 | 1 | 69934  | 1.43E-05 |
| Nrap          | 0 | 1 | 1 | 70003  | 1.43E-05 |
| Kremen1       | 1 | 0 | 1 | 70007  | 1.43E-05 |
| Alg14         | 0 | 1 | 1 | 70195  | 1.42E-05 |
| Vtcn1         | 0 | 1 | 1 | 70221  | 1.42E-05 |
| Lrrc8b        | 1 | 0 | 1 | 70415  | 1.42E-05 |
| Spen          | 0 | 1 | 1 | 70708  | 1.41E-05 |
| Farsb         | 0 | 1 | 1 | 70902  | 1.41E-05 |
| Atl1          | 0 | 1 | 1 | 70981  | 1.41E-05 |
| 4922505G16Rik | 0 | 1 | 1 | 71000  | 1.41E-05 |
| Eif4g3        | 2 | 1 | 3 | 215487 | 1.39E-05 |
| AC158992.1    | 0 | 1 | 1 | 72106  | 1.39E-05 |
| Gm20517       | 0 | 1 | 1 | 72273  | 1.38E-05 |
| Acsl4         | 1 | 0 | 1 | 72543  | 1.38E-05 |
| Cd99l2        | 0 | 1 | 1 | 72790  | 1.37E-05 |
| Myo5c         | 1 | 0 | 1 | 73438  | 1.36E-05 |
| Fndc3b        | 2 | 2 | 4 | 294278 | 1.36E-05 |
| Boc           | 1 | 0 | 1 | 73853  | 1.35E-05 |
| Wipf3         | 0 | 1 | 1 | 74166  | 1.35E-05 |
| Ylpm1         | 0 | 1 | 1 | 74195  | 1.35E-05 |
| Slc6a6        | 0 | 1 | 1 | 74997  | 1.33E-05 |
| Rnf150        | 1 | 2 | 3 | 227916 | 1.32E-05 |
| Efr3b         | 1 | 0 | 1 | 76362  | 1.31E-05 |
| Clip4         | 0 | 1 | 1 | 76405  | 1.31E-05 |
| Slc1a3        | 1 | 0 | 1 | 76641  | 1.30E-05 |
| Dixdc1        | 1 | 0 | 1 | 76766  | 1.30E-05 |
| Ppfia1        | 0 | 1 | 1 | 76975  | 1.30E-05 |
| 2900026A02Rik | 0 | 1 | 1 | 77029  | 1.30E-05 |
| Camsap2       | 1 | 0 | 1 | 77982  | 1.28E-05 |

|           |   |   |   |        |          |
|-----------|---|---|---|--------|----------|
| Jakmip2   | 2 | 0 | 2 | 156366 | 1.28E-05 |
| Cc2d2a    | 0 | 1 | 1 | 78594  | 1.27E-05 |
| Igf1      | 0 | 1 | 1 | 78778  | 1.27E-05 |
| Slc1a1    | 0 | 1 | 1 | 78912  | 1.27E-05 |
| Pla2g4e   | 0 | 1 | 1 | 78924  | 1.27E-05 |
| Lypla1    | 0 | 1 | 1 | 78983  | 1.27E-05 |
| Ttc23     | 0 | 1 | 1 | 79167  | 1.26E-05 |
| Rnf130    | 1 | 0 | 1 | 79413  | 1.26E-05 |
| BC031353  | 1 | 0 | 1 | 79416  | 1.26E-05 |
| Gdpd5     | 1 | 0 | 1 | 79435  | 1.26E-05 |
| Lcor      | 1 | 0 | 1 | 79602  | 1.26E-05 |
| Epc1      | 1 | 0 | 1 | 80158  | 1.25E-05 |
| Tmem245   | 0 | 1 | 1 | 80515  | 1.24E-05 |
| Neurl1a   | 1 | 0 | 1 | 80621  | 1.24E-05 |
| Ubap2     | 0 | 1 | 1 | 80832  | 1.24E-05 |
| Myh9      | 1 | 0 | 1 | 81589  | 1.23E-05 |
| Nr2c2     | 0 | 1 | 1 | 81668  | 1.22E-05 |
| Ubr2      | 1 | 0 | 1 | 82241  | 1.22E-05 |
| Dera      | 0 | 1 | 1 | 83350  | 1.20E-05 |
| Raver2    | 1 | 0 | 1 | 83388  | 1.20E-05 |
| Cyp39a1   | 0 | 1 | 1 | 84007  | 1.19E-05 |
| Trpm7     | 0 | 1 | 1 | 84666  | 1.18E-05 |
| Kidins220 | 1 | 0 | 1 | 84766  | 1.18E-05 |
| Inpp5f    | 0 | 1 | 1 | 85098  | 1.18E-05 |
| Ccdc162   | 1 | 1 | 2 | 170455 | 1.17E-05 |
| Nfat5     | 1 | 0 | 1 | 86048  | 1.16E-05 |
| Hhat      | 1 | 2 | 3 | 258386 | 1.16E-05 |
| Ppp2r2c   | 1 | 0 | 1 | 86566  | 1.16E-05 |
| Spats2    | 0 | 1 | 1 | 86629  | 1.15E-05 |
| Kcnab2    | 0 | 1 | 1 | 87130  | 1.15E-05 |
| Pstpip2   | 1 | 0 | 1 | 87463  | 1.14E-05 |
| Cldn10    | 1 | 0 | 1 | 87619  | 1.14E-05 |
| Ikzf1     | 0 | 1 | 1 | 87924  | 1.14E-05 |
| Cblb      | 0 | 2 | 2 | 176499 | 1.13E-05 |
| Mpp6      | 0 | 1 | 1 | 88358  | 1.13E-05 |
| Eps8      | 1 | 1 | 2 | 177632 | 1.13E-05 |
| Herc3     | 0 | 1 | 1 | 88934  | 1.12E-05 |
| Dym       | 2 | 1 | 3 | 268195 | 1.12E-05 |
| Hsf2bp    | 0 | 1 | 1 | 89740  | 1.11E-05 |
| Pde9a     | 1 | 0 | 1 | 90077  | 1.11E-05 |

|               |   |   |   |        |          |
|---------------|---|---|---|--------|----------|
| Pax5          | 1 | 1 | 2 | 180302 | 1.11E-05 |
| 1110003E01Rik | 0 | 1 | 1 | 90341  | 1.11E-05 |
| Fgf1          | 0 | 1 | 1 | 90732  | 1.10E-05 |
| Mmd           | 1 | 0 | 1 | 90906  | 1.10E-05 |
| Il1r1         | 0 | 1 | 1 | 91119  | 1.10E-05 |
| Dgkd          | 0 | 1 | 1 | 91203  | 1.10E-05 |
| Spnb4         | 0 | 1 | 1 | 91304  | 1.10E-05 |
| Ankrd11       | 1 | 0 | 1 | 91457  | 1.09E-05 |
| Tgfbr3        | 1 | 1 | 2 | 183060 | 1.09E-05 |
| Prep          | 0 | 1 | 1 | 91792  | 1.09E-05 |
| Abhd2         | 0 | 1 | 1 | 92308  | 1.08E-05 |
| Clock         | 0 | 1 | 1 | 92372  | 1.08E-05 |
| Sema4d        | 0 | 1 | 1 | 92502  | 1.08E-05 |
| Acot7         | 0 | 1 | 1 | 93722  | 1.07E-05 |
| Gcap14        | 1 | 0 | 1 | 93829  | 1.07E-05 |
| Ckap5         | 0 | 1 | 1 | 93903  | 1.06E-05 |
| Itpkb         | 0 | 1 | 1 | 94318  | 1.06E-05 |
| Zfp516        | 0 | 1 | 1 | 94436  | 1.06E-05 |
| Ccnd3         | 1 | 0 | 1 | 94633  | 1.06E-05 |
| Traf5         | 0 | 1 | 1 | 95130  | 1.05E-05 |
| Rab30         | 0 | 1 | 1 | 95515  | 1.05E-05 |
| Lhpp          | 0 | 1 | 1 | 95783  | 1.04E-05 |
| Cpne8         | 1 | 1 | 2 | 191951 | 1.04E-05 |
| Tiam1         | 0 | 2 | 2 | 192970 | 1.04E-05 |
| Lgr4          | 1 | 0 | 1 | 96611  | 1.04E-05 |
| Rgs17         | 0 | 1 | 1 | 96738  | 1.03E-05 |
| Lima1         | 0 | 1 | 1 | 96959  | 1.03E-05 |
| Ppp2r5c       | 0 | 1 | 1 | 97323  | 1.03E-05 |
| Stard13       | 1 | 1 | 2 | 196209 | 1.02E-05 |
| Dmrt1         | 0 | 1 | 1 | 98712  | 1.01E-05 |
| Dst           | 0 | 3 | 3 | 296826 | 1.01E-05 |
| Slc44a5       | 1 | 2 | 3 | 298287 | 1.01E-05 |
| RP24-67K5.1   | 1 | 0 | 1 | 100090 | 9.99E-06 |
| Nin           | 0 | 1 | 1 | 100491 | 9.95E-06 |
| Smurf2        | 0 | 1 | 1 | 100650 | 9.94E-06 |
| Wwp1          | 1 | 0 | 1 | 100691 | 9.93E-06 |
| Dcaf5         | 0 | 1 | 1 | 100755 | 9.93E-06 |
| 3110082I17Rik | 0 | 1 | 1 | 100764 | 9.92E-06 |
| Frmpd1        | 0 | 1 | 1 | 101062 | 9.89E-06 |
| Lims1         | 1 | 0 | 1 | 101226 | 9.88E-06 |

|               |   |   |   |        |          |
|---------------|---|---|---|--------|----------|
| Tox3          | 0 | 1 | 1 | 101304 | 9.87E-06 |
| Ccdc41        | 0 | 1 | 1 | 101547 | 9.85E-06 |
| Clmn          | 1 | 0 | 1 | 101963 | 9.81E-06 |
| Col6a5        | 1 | 0 | 1 | 101976 | 9.81E-06 |
| Zfp608        | 1 | 0 | 1 | 102136 | 9.79E-06 |
| Cmip          | 0 | 2 | 2 | 204485 | 9.78E-06 |
| Ppargc1b      | 1 | 0 | 1 | 102296 | 9.78E-06 |
| Uggt1         | 0 | 1 | 1 | 102776 | 9.73E-06 |
| Uggt1         | 0 | 1 | 1 | 102776 | 9.73E-06 |
| Rin2          | 0 | 1 | 1 | 102883 | 9.72E-06 |
| Itih5         | 1 | 0 | 1 | 102959 | 9.71E-06 |
| Synj2         | 1 | 0 | 1 | 103011 | 9.71E-06 |
| Zmiz1         | 1 | 1 | 2 | 207559 | 9.64E-06 |
| 2610017I09Rik | 1 | 0 | 1 | 104055 | 9.61E-06 |
| Wac           | 0 | 1 | 1 | 104716 | 9.55E-06 |
| Wac           | 0 | 1 | 1 | 104716 | 9.55E-06 |
| Glg1          | 0 | 1 | 1 | 104796 | 9.54E-06 |
| Cecr2         | 1 | 0 | 1 | 104822 | 9.54E-06 |
| Gng2          | 1 | 0 | 1 | 105069 | 9.52E-06 |
| Elovl6        | 0 | 1 | 1 | 106110 | 9.42E-06 |
| Lrrc20        | 0 | 1 | 1 | 106394 | 9.40E-06 |
| Cables1       | 0 | 1 | 1 | 106408 | 9.40E-06 |
| Atp8b5        | 0 | 1 | 1 | 106675 | 9.37E-06 |
| Nfkb1         | 0 | 1 | 1 | 106893 | 9.36E-06 |
| Add3          | 1 | 0 | 1 | 106955 | 9.35E-06 |
| Sorbs1        | 1 | 0 | 1 | 107219 | 9.33E-06 |
| Sfmbt1        | 0 | 1 | 1 | 107865 | 9.27E-06 |
| Mtor          | 1 | 0 | 1 | 109073 | 9.17E-06 |
| Tnrc6c        | 1 | 0 | 1 | 109151 | 9.16E-06 |
| Fgd6          | 0 | 1 | 1 | 109339 | 9.15E-06 |
| Klhl3         | 0 | 1 | 1 | 109372 | 9.14E-06 |
| Hs3st2        | 0 | 1 | 1 | 109473 | 9.13E-06 |
| Nedd4l        | 2 | 1 | 3 | 330071 | 9.09E-06 |
| Met           | 0 | 1 | 1 | 110181 | 9.08E-06 |
| Plekhh2       | 1 | 0 | 1 | 110248 | 9.07E-06 |
| Drosha        | 0 | 1 | 1 | 110476 | 9.05E-06 |
| Rasa3         | 1 | 0 | 1 | 110654 | 9.04E-06 |
| Hk1           | 0 | 1 | 1 | 111054 | 9.00E-06 |
| Atp11a        | 1 | 0 | 1 | 111715 | 8.95E-06 |
| Atp10b        | 0 | 1 | 1 | 112409 | 8.90E-06 |

|               |   |   |   |        |          |
|---------------|---|---|---|--------|----------|
| Ablim3        | 0 | 1 | 1 | 112458 | 8.89E-06 |
| Jak1          | 0 | 1 | 1 | 112916 | 8.86E-06 |
| Ppargc1a      | 1 | 0 | 1 | 113477 | 8.81E-06 |
| Dapk2         | 1 | 0 | 1 | 114020 | 8.77E-06 |
| Galnt2        | 1 | 0 | 1 | 114334 | 8.75E-06 |
| Gm14697       | 1 | 0 | 1 | 115564 | 8.65E-06 |
| Fam193a       | 1 | 0 | 1 | 116524 | 8.58E-06 |
| AU040320      | 0 | 1 | 1 | 116527 | 8.58E-06 |
| Iqck          | 0 | 1 | 1 | 116893 | 8.55E-06 |
| 2210408F21Rik | 0 | 1 | 1 | 117054 | 8.54E-06 |
| Taf4b         | 0 | 1 | 1 | 117115 | 8.54E-06 |
| Etv6          | 1 | 1 | 2 | 234459 | 8.53E-06 |
| Kdm6a         | 1 | 0 | 1 | 117362 | 8.52E-06 |
| Coro2b        | 0 | 1 | 1 | 117553 | 8.51E-06 |
| Sgk1          | 1 | 0 | 1 | 117720 | 8.49E-06 |
| Wdfy3         | 1 | 1 | 2 | 236966 | 8.44E-06 |
| Shroom4       | 1 | 1 | 2 | 237595 | 8.42E-06 |
| Lgr6          | 0 | 1 | 1 | 118929 | 8.41E-06 |
| Fli1          | 0 | 1 | 1 | 119182 | 8.39E-06 |
| Btbd9         | 1 | 2 | 3 | 360764 | 8.32E-06 |
| Ebf3          | 1 | 0 | 1 | 120773 | 8.28E-06 |
| Rnf216        | 0 | 1 | 1 | 122128 | 8.19E-06 |
| Gm17106       | 0 | 1 | 1 | 122748 | 8.15E-06 |
| Usp6nl        | 1 | 0 | 1 | 123724 | 8.08E-06 |
| Atrn          | 1 | 0 | 1 | 123839 | 8.08E-06 |
| Scmh1         | 1 | 0 | 1 | 124906 | 8.01E-06 |
| Dyrk1a        | 0 | 1 | 1 | 125508 | 7.97E-06 |
| Tom1l2        | 0 | 1 | 1 | 126192 | 7.92E-06 |
| Adra1b        | 1 | 0 | 1 | 126605 | 7.90E-06 |
| Uvrags        | 1 | 1 | 2 | 254402 | 7.86E-06 |
| Atxn10        | 0 | 1 | 1 | 127456 | 7.85E-06 |
| Tnfaip8       | 0 | 1 | 1 | 127747 | 7.83E-06 |
| Ank           | 1 | 0 | 1 | 128233 | 7.80E-06 |
| Mbnl1         | 0 | 1 | 1 | 128497 | 7.78E-06 |
| Oxct1         | 1 | 0 | 1 | 128962 | 7.75E-06 |
| Entpd1        | 1 | 0 | 1 | 129237 | 7.74E-06 |
| Eml4          | 0 | 1 | 1 | 129431 | 7.73E-06 |
| Spag9         | 0 | 1 | 1 | 129995 | 7.69E-06 |
| Nt5dc1        | 0 | 1 | 1 | 130265 | 7.68E-06 |
| Evi5          | 1 | 0 | 1 | 130313 | 7.67E-06 |

|         |   |   |   |        |          |
|---------|---|---|---|--------|----------|
| Pou6f2  | 0 | 2 | 2 | 260941 | 7.66E-06 |
| Chn2    | 2 | 0 | 2 | 262257 | 7.63E-06 |
| Fam49b  | 1 | 0 | 1 | 131352 | 7.61E-06 |
| Adk     | 3 | 0 | 3 | 395995 | 7.58E-06 |
| Lrrc8d  | 1 | 0 | 1 | 132468 | 7.55E-06 |
| Ksr1    | 1 | 0 | 1 | 132968 | 7.52E-06 |
| Adcy9   | 0 | 1 | 1 | 132970 | 7.52E-06 |
| Gpd2    | 1 | 0 | 1 | 133085 | 7.51E-06 |
| Mtap7   | 1 | 0 | 1 | 133119 | 7.51E-06 |
| Vps53   | 0 | 1 | 1 | 133422 | 7.50E-06 |
| Sgms1   | 1 | 1 | 2 | 266988 | 7.49E-06 |
| Flnb    | 0 | 1 | 1 | 133632 | 7.48E-06 |
| Pax6os1 | 1 | 0 | 1 | 134251 | 7.45E-06 |
| Tnni3k  | 0 | 2 | 2 | 269106 | 7.43E-06 |
| Map3k15 | 0 | 1 | 1 | 134919 | 7.41E-06 |
| Syt16   | 0 | 2 | 2 | 270156 | 7.40E-06 |
| Ralgps2 | 1 | 0 | 1 | 135461 | 7.38E-06 |
| Abca4   | 1 | 0 | 1 | 135619 | 7.37E-06 |
| Gpatch2 | 1 | 0 | 1 | 136197 | 7.34E-06 |
| Col4a2  | 0 | 1 | 1 | 136483 | 7.33E-06 |
| Tnks    | 0 | 1 | 1 | 136512 | 7.33E-06 |
| Lipc    | 0 | 1 | 1 | 136680 | 7.32E-06 |
| Zfp462  | 0 | 1 | 1 | 138516 | 7.22E-06 |
| Ankrd17 | 1 | 0 | 1 | 138996 | 7.19E-06 |
| Pacs1   | 0 | 1 | 1 | 139432 | 7.17E-06 |
| Pkhd1l1 | 1 | 0 | 1 | 139591 | 7.16E-06 |
| Tmem241 | 0 | 1 | 1 | 140178 | 7.13E-06 |
| Mapre2  | 1 | 0 | 1 | 141529 | 7.07E-06 |
| Mef2a   | 0 | 1 | 1 | 141696 | 7.06E-06 |
| Wwc1    | 0 | 1 | 1 | 142128 | 7.04E-06 |
| Mdga1   | 1 | 0 | 1 | 142132 | 7.04E-06 |
| Obscn   | 0 | 1 | 1 | 142147 | 7.03E-06 |
| Mtus1   | 1 | 0 | 1 | 142813 | 7.00E-06 |
| Kdm2b   | 0 | 1 | 1 | 144413 | 6.92E-06 |
| Zhx2    | 0 | 1 | 1 | 145169 | 6.89E-06 |
| Cntn1   | 0 | 2 | 2 | 290803 | 6.88E-06 |
| Tmem131 | 0 | 1 | 1 | 147337 | 6.79E-06 |
| Gm4117  | 1 | 0 | 1 | 147707 | 6.77E-06 |
| Dok5    | 1 | 0 | 1 | 147963 | 6.76E-06 |
| Il1rap  | 1 | 0 | 1 | 148414 | 6.74E-06 |

|               |   |   |   |        |          |
|---------------|---|---|---|--------|----------|
| Ptpn14        | 1 | 0 | 1 | 148428 | 6.74E-06 |
| Cttnbp2       | 0 | 1 | 1 | 148861 | 6.72E-06 |
| Klhl29        | 1 | 1 | 2 | 298211 | 6.71E-06 |
| Ubash3b       | 1 | 0 | 1 | 150600 | 6.64E-06 |
| Dlgap4        | 0 | 1 | 1 | 150659 | 6.64E-06 |
| Adamts18      | 1 | 0 | 1 | 151490 | 6.60E-06 |
| Srrm4         | 0 | 1 | 1 | 152546 | 6.56E-06 |
| Plxnc1        | 0 | 1 | 1 | 153713 | 6.51E-06 |
| Man2a1        | 1 | 0 | 1 | 154375 | 6.48E-06 |
| Vwc2          | 0 | 1 | 1 | 154709 | 6.46E-06 |
| Taok3         | 0 | 1 | 1 | 155091 | 6.45E-06 |
| Dgkh          | 1 | 0 | 1 | 155481 | 6.43E-06 |
| 2010111I01Rik | 2 | 0 | 2 | 311163 | 6.43E-06 |
| Rbm47         | 0 | 1 | 1 | 156569 | 6.39E-06 |
| Ube2cbp       | 1 | 0 | 1 | 157717 | 6.34E-06 |
| 2610035D17Rik | 1 | 0 | 1 | 157944 | 6.33E-06 |
| Spata5        | 0 | 1 | 1 | 159201 | 6.28E-06 |
| Vwc2l         | 0 | 1 | 1 | 159683 | 6.26E-06 |
| Kcnh1         | 1 | 1 | 2 | 319376 | 6.26E-06 |
| Kcnq1         | 1 | 1 | 2 | 319789 | 6.25E-06 |
| Loxhd1        | 0 | 1 | 1 | 160384 | 6.24E-06 |
| Srbd1         | 1 | 0 | 1 | 160511 | 6.23E-06 |
| Arhgap28      | 0 | 1 | 1 | 161408 | 6.20E-06 |
| Lrrk1         | 0 | 1 | 1 | 161439 | 6.19E-06 |
| Fbxl13        | 1 | 0 | 1 | 161759 | 6.18E-06 |
| Ncor2         | 1 | 0 | 1 | 162067 | 6.17E-06 |
| Chd6          | 1 | 0 | 1 | 162098 | 6.17E-06 |
| Aff3          | 2 | 1 | 3 | 487630 | 6.15E-06 |
| Filip1        | 0 | 1 | 1 | 162754 | 6.14E-06 |
| Mef2c         | 0 | 1 | 1 | 163046 | 6.13E-06 |
| March3        | 0 | 1 | 1 | 163833 | 6.10E-06 |
| Fbxw7         | 1 | 0 | 1 | 163931 | 6.10E-06 |
| Vps13a        | 0 | 1 | 1 | 164060 | 6.10E-06 |
| Parva         | 1 | 0 | 1 | 164188 | 6.09E-06 |
| Gm12132       | 1 | 1 | 2 | 329638 | 6.07E-06 |
| Vav2          | 0 | 1 | 1 | 164930 | 6.06E-06 |
| Osbpl10       | 1 | 0 | 1 | 164945 | 6.06E-06 |
| Egfr          | 0 | 1 | 1 | 165956 | 6.03E-06 |
| Gadl1         | 0 | 1 | 1 | 166722 | 6.00E-06 |
| Stab2         | 0 | 1 | 1 | 166828 | 5.99E-06 |

|               |   |   |   |        |          |
|---------------|---|---|---|--------|----------|
| Fam107b       | 1 | 0 | 1 | 168385 | 5.94E-06 |
| Itpr1         | 0 | 2 | 2 | 337992 | 5.92E-06 |
| Dock3         | 0 | 2 | 2 | 339076 | 5.90E-06 |
| Ccdc109a      | 0 | 1 | 1 | 169709 | 5.89E-06 |
| Scn1a         | 1 | 0 | 1 | 170060 | 5.88E-06 |
| Rere          | 0 | 2 | 2 | 340321 | 5.88E-06 |
| Adamts9       | 0 | 1 | 1 | 170794 | 5.86E-06 |
| Myrip         | 0 | 1 | 1 | 170906 | 5.85E-06 |
| Man1a         | 1 | 0 | 1 | 171009 | 5.85E-06 |
| Atp10a        | 1 | 0 | 1 | 171225 | 5.84E-06 |
| Dab2ip        | 1 | 0 | 1 | 172729 | 5.79E-06 |
| Nfia          | 2 | 0 | 2 | 346141 | 5.78E-06 |
| Sv2c          | 0 | 1 | 1 | 173135 | 5.78E-06 |
| Ptpn13        | 1 | 0 | 1 | 173168 | 5.77E-06 |
| Smarca2       | 1 | 0 | 1 | 173207 | 5.77E-06 |
| Tmcc1         | 0 | 1 | 1 | 174869 | 5.72E-06 |
| Scn8a         | 0 | 1 | 1 | 175247 | 5.71E-06 |
| Ror2          | 0 | 1 | 1 | 176813 | 5.66E-06 |
| Setbp1        | 0 | 2 | 2 | 359012 | 5.57E-06 |
| Ttc29         | 0 | 1 | 1 | 181030 | 5.52E-06 |
| Zbtb16        | 0 | 1 | 1 | 181635 | 5.51E-06 |
| Slc44a1       | 0 | 1 | 1 | 182066 | 5.49E-06 |
| Tspan9        | 0 | 1 | 1 | 182199 | 5.49E-06 |
| Zpbp          | 0 | 1 | 1 | 182783 | 5.47E-06 |
| Zfp704        | 0 | 1 | 1 | 183075 | 5.46E-06 |
| Arid5b        | 1 | 0 | 1 | 183134 | 5.46E-06 |
| A230006K03Rik | 0 | 1 | 1 | 183726 | 5.44E-06 |
| Hivep2        | 0 | 1 | 1 | 184998 | 5.41E-06 |
| Sipa1l3       | 1 | 0 | 1 | 185083 | 5.40E-06 |
| Cwc27         | 0 | 1 | 1 | 186003 | 5.38E-06 |
| Osbp1a        | 1 | 0 | 1 | 186528 | 5.36E-06 |
| Hcn1          | 2 | 0 | 2 | 374323 | 5.34E-06 |
| Tcerg1l       | 1 | 0 | 1 | 188757 | 5.30E-06 |
| Dgkg          | 0 | 1 | 1 | 188761 | 5.30E-06 |
| Frmd3         | 1 | 0 | 1 | 188773 | 5.30E-06 |
| Inpp5a        | 1 | 0 | 1 | 190544 | 5.25E-06 |
| Apba1         | 1 | 0 | 1 | 190722 | 5.24E-06 |
| Myo10         | 0 | 1 | 1 | 191149 | 5.23E-06 |
| Ntn1          | 1 | 0 | 1 | 191460 | 5.22E-06 |
| Tmem163       | 1 | 0 | 1 | 191551 | 5.22E-06 |



|               |   |   |   |        |          |
|---------------|---|---|---|--------|----------|
| Tbc1d1        | 0 | 1 | 1 | 192036 | 5.21E-06 |
| Tbc1d1        | 0 | 1 | 1 | 192036 | 5.21E-06 |
| Pex5l         | 1 | 0 | 1 | 193840 | 5.16E-06 |
| Pld1          | 1 | 0 | 1 | 194668 | 5.14E-06 |
| Myo3b         | 1 | 1 | 2 | 390073 | 5.13E-06 |
| 1700011I03Rik | 0 | 1 | 1 | 197286 | 5.07E-06 |
| Kank1         | 1 | 0 | 1 | 197522 | 5.06E-06 |
| Necab1        | 0 | 1 | 1 | 197550 | 5.06E-06 |
| Sntg2         | 0 | 1 | 1 | 198894 | 5.03E-06 |
| Foxp1         | 2 | 1 | 3 | 597384 | 5.02E-06 |
| Clec16a       | 1 | 0 | 1 | 199540 | 5.01E-06 |
| Glis1         | 0 | 1 | 1 | 200471 | 4.99E-06 |
| Antxr1        | 1 | 0 | 1 | 201922 | 4.95E-06 |
| Bri3          | 1 | 0 | 1 | 202321 | 4.94E-06 |
| St3gal3       | 0 | 1 | 1 | 202761 | 4.93E-06 |
| Nr6a1         | 1 | 0 | 1 | 204319 | 4.89E-06 |
| Med13l        | 1 | 0 | 1 | 204717 | 4.88E-06 |
| Lmo7          | 1 | 0 | 1 | 204754 | 4.88E-06 |
| Alcam         | 0 | 1 | 1 | 205079 | 4.88E-06 |
| Abr           | 1 | 0 | 1 | 205581 | 4.86E-06 |
| Unc13b        | 0 | 1 | 1 | 205919 | 4.86E-06 |
| Tnik          | 2 | 0 | 2 | 412645 | 4.85E-06 |
| Rap1gap2      | 0 | 1 | 1 | 206831 | 4.83E-06 |
| Ap3b1         | 1 | 0 | 1 | 207357 | 4.82E-06 |
| Gabrb2        | 1 | 0 | 1 | 209272 | 4.78E-06 |
| Rbfox3        | 1 | 1 | 2 | 421836 | 4.74E-06 |
| Abi3bp        | 0 | 1 | 1 | 212283 | 4.71E-06 |
| AL731670.1    | 0 | 1 | 1 | 212567 | 4.70E-06 |
| Rbms1         | 0 | 1 | 1 | 213000 | 4.69E-06 |
| Prim2         | 0 | 1 | 1 | 215976 | 4.63E-06 |
| Mapkap1       | 1 | 0 | 1 | 218180 | 4.58E-06 |
| Gli2          | 0 | 1 | 1 | 219488 | 4.56E-06 |
| Plxna4        | 1 | 1 | 2 | 442267 | 4.52E-06 |
| Chl1          | 0 | 1 | 1 | 222160 | 4.50E-06 |
| Samd4         | 1 | 0 | 1 | 222964 | 4.49E-06 |
| Abcc4         | 1 | 0 | 1 | 223528 | 4.47E-06 |
| Sfmbt2        | 0 | 1 | 1 | 224744 | 4.45E-06 |
| Rnf220        | 0 | 1 | 1 | 225590 | 4.43E-06 |
| Wdfy4         | 0 | 1 | 1 | 225962 | 4.43E-06 |
| Gab2          | 1 | 0 | 1 | 227190 | 4.40E-06 |

|          |   |   |   |        |          |
|----------|---|---|---|--------|----------|
| Nsmce2   | 0 | 1 | 1 | 227486 | 4.40E-06 |
| Pdzrn3   | 0 | 1 | 1 | 228289 | 4.38E-06 |
| Ttll11   | 1 | 0 | 1 | 228673 | 4.37E-06 |
| Mctp2    | 0 | 1 | 1 | 228764 | 4.37E-06 |
| Tnrc6b   | 1 | 0 | 1 | 229768 | 4.35E-06 |
| Sema3e   | 0 | 1 | 1 | 231414 | 4.32E-06 |
| Reps2    | 0 | 1 | 1 | 231696 | 4.32E-06 |
| Mgmt     | 0 | 1 | 1 | 233577 | 4.28E-06 |
| Tanc1    | 1 | 0 | 1 | 234108 | 4.27E-06 |
| Htr2c    | 1 | 0 | 1 | 234765 | 4.26E-06 |
| Ldlrad3  | 1 | 0 | 1 | 236183 | 4.23E-06 |
| Bicc1    | 1 | 0 | 1 | 236869 | 4.22E-06 |
| Greb1l   | 1 | 0 | 1 | 237758 | 4.21E-06 |
| Fry      | 0 | 1 | 1 | 237823 | 4.20E-06 |
| Akt3     | 0 | 1 | 1 | 238131 | 4.20E-06 |
| Stx8     | 1 | 0 | 1 | 240956 | 4.15E-06 |
| Nf1      | 0 | 1 | 1 | 241920 | 4.13E-06 |
| Ssh2     | 1 | 0 | 1 | 243934 | 4.10E-06 |
| Dtna     | 0 | 1 | 1 | 244300 | 4.09E-06 |
| Suclg2   | 1 | 0 | 1 | 244704 | 4.09E-06 |
| Rora     | 2 | 1 | 3 | 734461 | 4.08E-06 |
| Eya4     | 0 | 1 | 1 | 245728 | 4.07E-06 |
| Ank3     | 1 | 1 | 2 | 493215 | 4.06E-06 |
| Camk2d   | 1 | 0 | 1 | 248612 | 4.02E-06 |
| Rgl1     | 1 | 0 | 1 | 249593 | 4.01E-06 |
| Car10    | 1 | 1 | 2 | 503722 | 3.97E-06 |
| Gnaq     | 0 | 1 | 1 | 254633 | 3.93E-06 |
| Pcdha10  | 0 | 1 | 1 | 257373 | 3.89E-06 |
| Pcdha10  | 0 | 1 | 1 | 257373 | 3.89E-06 |
| Pcdha10  | 0 | 1 | 1 | 257373 | 3.89E-06 |
| Pcdha10  | 0 | 1 | 1 | 257373 | 3.89E-06 |
| Pcdha10  | 0 | 1 | 1 | 257373 | 3.89E-06 |
| Pcdha10  | 0 | 1 | 1 | 257373 | 3.89E-06 |
| Pcdha10  | 0 | 1 | 1 | 257373 | 3.89E-06 |
| Pcdha10  | 0 | 1 | 1 | 257373 | 3.89E-06 |
| Pcdha10  | 0 | 1 | 1 | 257373 | 3.89E-06 |
| Pcdha10  | 0 | 1 | 1 | 257373 | 3.89E-06 |
| Wdr17    | 0 | 1 | 1 | 258130 | 3.87E-06 |
| Arhgap26 | 2 | 1 | 3 | 774751 | 3.87E-06 |
| Zdhhc14  | 0 | 1 | 1 | 261292 | 3.83E-06 |
| Frdm5    | 0 | 1 | 1 | 261559 | 3.82E-06 |

|               |   |   |   |         |          |
|---------------|---|---|---|---------|----------|
| Socs6         | 0 | 1 | 1 | 262258  | 3.81E-06 |
| Tmem135       | 0 | 1 | 1 | 264500  | 3.78E-06 |
| Ghr           | 1 | 0 | 1 | 265733  | 3.76E-06 |
| Phactr2       | 0 | 1 | 1 | 266680  | 3.75E-06 |
| Gli3          | 1 | 0 | 1 | 266792  | 3.75E-06 |
| Mtap2         | 0 | 1 | 1 | 267311  | 3.74E-06 |
| Arhgap10      | 0 | 1 | 1 | 267542  | 3.74E-06 |
| Tcf12         | 1 | 0 | 1 | 267568  | 3.74E-06 |
| Ppp3ca        | 1 | 0 | 1 | 267604  | 3.74E-06 |
| Acaca         | 0 | 1 | 1 | 271980  | 3.68E-06 |
| Acaca         | 0 | 1 | 1 | 271980  | 3.68E-06 |
| Btbd11        | 1 | 0 | 1 | 273479  | 3.66E-06 |
| Thada         | 1 | 0 | 1 | 276141  | 3.62E-06 |
| Rapegf4       | 1 | 0 | 1 | 276235  | 3.62E-06 |
| C130026I21Rik | 0 | 1 | 1 | 277877  | 3.60E-06 |
| Enox2         | 0 | 1 | 1 | 278553  | 3.59E-06 |
| Tmem108       | 0 | 1 | 1 | 278902  | 3.59E-06 |
| Lrba          | 2 | 0 | 2 | 558004  | 3.58E-06 |
| 4930529M08Rik | 1 | 0 | 1 | 280256  | 3.57E-06 |
| Dab1          | 2 | 2 | 4 | 1125486 | 3.55E-06 |
| Ablim1        | 1 | 0 | 1 | 282187  | 3.54E-06 |
| Cog5          | 1 | 0 | 1 | 282762  | 3.54E-06 |
| Smyd3         | 1 | 1 | 2 | 566082  | 3.53E-06 |
| Fgf12         | 1 | 0 | 1 | 285108  | 3.51E-06 |
| Stau2         | 0 | 1 | 1 | 291439  | 3.43E-06 |
| Col23a1       | 1 | 0 | 1 | 293999  | 3.40E-06 |
| Gm10649       | 0 | 1 | 1 | 295396  | 3.39E-06 |
| Dclk1         | 0 | 1 | 1 | 296539  | 3.37E-06 |
| AW554918      | 0 | 1 | 1 | 298323  | 3.35E-06 |
| Sorcs3        | 2 | 0 | 2 | 599481  | 3.34E-06 |
| Pam           | 1 | 0 | 1 | 300533  | 3.33E-06 |
| Mapk10        | 1 | 0 | 1 | 303387  | 3.30E-06 |
| Rgnef         | 0 | 1 | 1 | 307571  | 3.25E-06 |
| Dnahc7a       | 0 | 1 | 1 | 309783  | 3.23E-06 |
| Adamts17      | 0 | 1 | 1 | 312891  | 3.20E-06 |
| Pld5          | 0 | 1 | 1 | 313007  | 3.19E-06 |
| Camta1        | 0 | 3 | 3 | 944555  | 3.18E-06 |
| BC057079      | 1 | 0 | 1 | 316383  | 3.16E-06 |
| Runx2         | 0 | 1 | 1 | 318811  | 3.14E-06 |
| AL935177.3    | 1 | 0 | 1 | 319633  | 3.13E-06 |

|          |   |   |   |         |          |
|----------|---|---|---|---------|----------|
| Dscaml1  | 0 | 1 | 1 | 322872  | 3.10E-06 |
| Sh3rf3   | 0 | 1 | 1 | 325558  | 3.07E-06 |
| Cadm1    | 1 | 0 | 1 | 327465  | 3.05E-06 |
| Ldb2     | 1 | 0 | 1 | 327575  | 3.05E-06 |
| Myo5b    | 1 | 0 | 1 | 330558  | 3.03E-06 |
| Lrfn5    | 0 | 1 | 1 | 334779  | 2.99E-06 |
| Prickle2 | 0 | 1 | 1 | 335254  | 2.98E-06 |
| Ccdc171  | 1 | 0 | 1 | 339187  | 2.95E-06 |
| Agmo     | 0 | 1 | 1 | 340562  | 2.94E-06 |
| Tln2     | 0 | 1 | 1 | 342617  | 2.92E-06 |
| Hydin    | 1 | 0 | 1 | 343277  | 2.91E-06 |
| Dis3l2   | 0 | 1 | 1 | 346294  | 2.89E-06 |
| Bach2    | 0 | 1 | 1 | 347305  | 2.88E-06 |
| Pde11a   | 1 | 0 | 1 | 349634  | 2.86E-06 |
| Gse1     | 0 | 1 | 1 | 350855  | 2.85E-06 |
| Vwa8     | 1 | 0 | 1 | 353133  | 2.83E-06 |
| Fto      | 0 | 1 | 1 | 354908  | 2.82E-06 |
| Ntng1    | 1 | 0 | 1 | 355469  | 2.81E-06 |
| Plcb4    | 1 | 0 | 1 | 355583  | 2.81E-06 |
| Diap2    | 0 | 2 | 2 | 716093  | 2.79E-06 |
| Stag1    | 1 | 0 | 1 | 360748  | 2.77E-06 |
| Ksr2     | 0 | 1 | 1 | 361004  | 2.77E-06 |
| Myo16    | 0 | 1 | 1 | 362170  | 2.76E-06 |
| Arl15    | 0 | 1 | 1 | 362957  | 2.76E-06 |
| Kcnip1   | 1 | 0 | 1 | 363814  | 2.75E-06 |
| Kcnt2    | 0 | 1 | 1 | 365848  | 2.73E-06 |
| Auts2    | 3 | 0 | 3 | 1106010 | 2.71E-06 |
| Atp11c   | 1 | 0 | 1 | 369409  | 2.71E-06 |
| B3galt1  | 0 | 1 | 1 | 374478  | 2.67E-06 |
| Dlgap2   | 1 | 1 | 2 | 751816  | 2.66E-06 |
| Zbtb20   | 1 | 1 | 2 | 766722  | 2.61E-06 |
| Ntrk3    | 1 | 0 | 1 | 386047  | 2.59E-06 |
| Pcdh15   | 4 | 0 | 4 | 1546973 | 2.59E-06 |
| Palld    | 0 | 1 | 1 | 389445  | 2.57E-06 |
| Cdh8     | 1 | 0 | 1 | 392001  | 2.55E-06 |
| Cdh23    | 0 | 1 | 1 | 393743  | 2.54E-06 |
| Kif26b   | 1 | 0 | 1 | 403731  | 2.48E-06 |
| Hivep3   | 1 | 0 | 1 | 404262  | 2.47E-06 |
| Gm20696  | 1 | 0 | 1 | 409314  | 2.44E-06 |
| Ttc28    | 0 | 1 | 1 | 409978  | 2.44E-06 |

|               |   |   |   |         |          |
|---------------|---|---|---|---------|----------|
| Grin2a        | 1 | 0 | 1 | 417212  | 2.40E-06 |
| Glis3         | 1 | 0 | 1 | 421227  | 2.37E-06 |
| Fstl4         | 0 | 1 | 1 | 423905  | 2.36E-06 |
| Ncald         | 0 | 1 | 1 | 426396  | 2.35E-06 |
| Luzp2         | 1 | 0 | 1 | 429408  | 2.33E-06 |
| Snx29         | 1 | 0 | 1 | 432565  | 2.31E-06 |
| Ephb1         | 0 | 1 | 1 | 432566  | 2.31E-06 |
| Zcchc16       | 0 | 1 | 1 | 433505  | 2.31E-06 |
| Dpyd          | 1 | 1 | 2 | 870790  | 2.30E-06 |
| Pacrg         | 0 | 1 | 1 | 437300  | 2.29E-06 |
| Gabrb1        | 0 | 1 | 1 | 438458  | 2.28E-06 |
| Agap1         | 1 | 0 | 1 | 440472  | 2.27E-06 |
| Grin2b        | 1 | 0 | 1 | 443686  | 2.25E-06 |
| Tenm3         | 1 | 0 | 1 | 447009  | 2.24E-06 |
| Cdh4          | 0 | 1 | 1 | 456943  | 2.19E-06 |
| Ppfia2        | 0 | 1 | 1 | 463158  | 2.16E-06 |
| Dok6          | 0 | 1 | 1 | 468447  | 2.13E-06 |
| Caln1         | 0 | 1 | 1 | 471170  | 2.12E-06 |
| Bcas3         | 1 | 0 | 1 | 472892  | 2.11E-06 |
| Sox5          | 0 | 2 | 2 | 953553  | 2.10E-06 |
| 2210408I21Rik | 1 | 0 | 1 | 477752  | 2.09E-06 |
| Spock1        | 0 | 1 | 1 | 478293  | 2.09E-06 |
| Utrn          | 0 | 1 | 1 | 479548  | 2.09E-06 |
| Magab18       | 1 | 0 | 1 | 480694  | 2.08E-06 |
| Slc25a21      | 1 | 0 | 1 | 484839  | 2.06E-06 |
| Sdk1          | 1 | 1 | 2 | 974097  | 2.05E-06 |
| Gm20388       | 8 | 1 | 9 | 4434882 | 2.03E-06 |
| Dnm3          | 0 | 1 | 1 | 495582  | 2.02E-06 |
| Pgcp          | 1 | 0 | 1 | 511424  | 1.96E-06 |
| Kcnd2         | 0 | 1 | 1 | 514303  | 1.94E-06 |
| Elmo1         | 1 | 0 | 1 | 517847  | 1.93E-06 |
| Atrnl1        | 0 | 1 | 1 | 522305  | 1.91E-06 |
| Grm5          | 0 | 1 | 1 | 532364  | 1.88E-06 |
| 1700007B14Rik | 1 | 0 | 1 | 535810  | 1.87E-06 |
| ErbB4         | 0 | 2 | 2 | 1075874 | 1.86E-06 |
| Fam19a1       | 1 | 0 | 1 | 544045  | 1.84E-06 |
| Dock2         | 1 | 0 | 1 | 557078  | 1.80E-06 |
| Vps13b        | 0 | 1 | 1 | 559683  | 1.79E-06 |
| Park2         | 1 | 0 | 1 | 568322  | 1.76E-06 |
| Ptptr         | 1 | 1 | 2 | 1139158 | 1.76E-06 |

|               |   |   |   |         |          |
|---------------|---|---|---|---------|----------|
| Unc5d         | 0 | 1 | 1 | 572622  | 1.75E-06 |
| Rabgap1l      | 1 | 0 | 1 | 573765  | 1.74E-06 |
| Cadps2        | 0 | 1 | 1 | 576649  | 1.73E-06 |
| Sox2ot        | 1 | 0 | 1 | 578182  | 1.73E-06 |
| Csmd2         | 0 | 1 | 1 | 579800  | 1.72E-06 |
| Clstn2        | 0 | 1 | 1 | 588787  | 1.70E-06 |
| Mecom         | 0 | 1 | 1 | 596710  | 1.68E-06 |
| Lpp           | 0 | 1 | 1 | 599227  | 1.67E-06 |
| Mast4         | 1 | 0 | 1 | 602012  | 1.66E-06 |
| Esrrg         | 1 | 0 | 1 | 606095  | 1.65E-06 |
| Magi1         | 0 | 1 | 1 | 607868  | 1.65E-06 |
| 5730522E02Rik | 0 | 1 | 1 | 608001  | 1.64E-06 |
| Cdk14         | 0 | 1 | 1 | 616922  | 1.62E-06 |
| Grip1         | 0 | 1 | 1 | 633228  | 1.58E-06 |
| Ii1rapl1      | 0 | 2 | 2 | 1374776 | 1.45E-06 |
| Fgf14         | 0 | 1 | 1 | 699221  | 1.43E-06 |
| Ush2a         | 0 | 1 | 1 | 703019  | 1.42E-06 |
| Mgat4c        | 0 | 1 | 1 | 709983  | 1.41E-06 |
| Exoc4         | 0 | 1 | 1 | 724895  | 1.38E-06 |
| Tenm4         | 0 | 1 | 1 | 739850  | 1.35E-06 |
| Fgfr2         | 2 | 2 | 4 | 2960900 | 1.35E-06 |
| Negr1         | 1 | 0 | 1 | 754652  | 1.33E-06 |
| Bai3          | 1 | 0 | 1 | 762232  | 1.31E-06 |
| Ptprn2        | 0 | 1 | 1 | 792448  | 1.26E-06 |
| Cacna2d3      | 1 | 0 | 1 | 816918  | 1.22E-06 |
| Csmd1         | 2 | 0 | 2 | 1643050 | 1.22E-06 |
| Dlgap1        | 0 | 1 | 1 | 852341  | 1.17E-06 |
| Pcdh9         | 0 | 1 | 1 | 873221  | 1.15E-06 |
| Cntnap5a      | 0 | 1 | 1 | 897271  | 1.11E-06 |
| Wwox          | 1 | 0 | 1 | 913054  | 1.10E-06 |
| Epha6         | 0 | 1 | 1 | 952049  | 1.05E-06 |
| Cadm2         | 1 | 0 | 1 | 965488  | 1.04E-06 |
| 1700112E06Rik | 1 | 0 | 1 | 1036374 | 9.65E-07 |
| Cdh13         | 1 | 0 | 1 | 1041189 | 9.60E-07 |
| Gpc6          | 0 | 1 | 1 | 1054233 | 9.49E-07 |
| Rbms3         | 1 | 0 | 1 | 1057168 | 9.46E-07 |
| Nrxn1         | 0 | 1 | 1 | 1059162 | 9.44E-07 |
| Accn1         | 1 | 0 | 1 | 1088289 | 9.19E-07 |
| Ctnna2        | 0 | 1 | 1 | 1098063 | 9.11E-07 |
| Prkg1         | 1 | 0 | 1 | 1195585 | 8.36E-07 |

|         |      |      |      |         |          |
|---------|------|------|------|---------|----------|
| Cntn5   | 1    | 0    | 1    | 1243885 | 8.04E-07 |
| Arfip1  | 1    | 0    | 1    | 1391424 | 7.19E-07 |
| Grid2   | 0    | 1    | 1    | 1412407 | 7.08E-07 |
| Gpc5    | 0    | 1    | 1    | 1432965 | 6.98E-07 |
| Pde4d   | 1    | 0    | 1    | 1503514 | 6.65E-07 |
| Pde4d   | 1    | 0    | 1    | 1503514 | 6.65E-07 |
| Ctnna3  | 1    | 0    | 1    | 1573570 | 6.35E-07 |
| Macrod2 | 0    | 1    | 1    | 1997658 | 5.01E-07 |
| Macrod2 | 0    | 1    | 1    | 1997658 | 5.01E-07 |
| Ptprd   | 0    | 1    | 1    | 2270724 | 4.40E-07 |
| (x)     | 426  | 521  | 947  |         |          |
| Total   | 1222 | 1400 | 2622 |         |          |

(x)=did not map to a gene

mean 2.71E-04

stdev 6.33E-03

median 1.60E-05
